# Supplementary material for: Impact of preconception vaginal microbiota on women’s risk of spontaneous preterm birth: protocol for a prospective case-cohort study
Source: PubMed Central journal article supplement — BMJ Open. 2020 Feb 25;10(2):e035186. doi: 10.1136/bmjopen-2019-035186 (PMC7045118; doi:10.1136/bmjopen-2019-035186), 2020-02-25

# BMJ Open

BMJ Open is committed to open peer review. As part of this commitment we make the peer review history of every article we publish publicly available.

When an article is published we post the peer reviewers' comments and the authors' responses online. We also post the versions of the paper that were used during peer review. These are the versions that the peer review comments apply to.

The versions of the paper that follow are the versions that were submitted during the peer review process. They are not the versions of record or the final published versions. They should not be cited or distributed as the published version of this manuscript.

BMJ Open is an open access journal and the full, final, typeset and author-corrected version of record of the manuscript is available on our site with no access controls, subscription charges or pay-per-view fees (<http://bmjopen.bmj.com>).

If you have any questions on BMJ Open's open peer review process please email [info.bmjopen@bmj.com](mailto:info.bmjopen@bmj.com)

# BMJ Open

## Impact of preconception vaginal microbiota on women's risk of spontaneous preterm birth: Protocol for a prospective case-cohort study

|                               |                                                                                                                                                                                                                                                                                                                                                                                                                                                                                                                                                                                                                                                                                                                                                                                                                                                                                                                                                                                                                                                                                                                                        |
|-------------------------------|----------------------------------------------------------------------------------------------------------------------------------------------------------------------------------------------------------------------------------------------------------------------------------------------------------------------------------------------------------------------------------------------------------------------------------------------------------------------------------------------------------------------------------------------------------------------------------------------------------------------------------------------------------------------------------------------------------------------------------------------------------------------------------------------------------------------------------------------------------------------------------------------------------------------------------------------------------------------------------------------------------------------------------------------------------------------------------------------------------------------------------------|
| Journal:                      | <i>BMJ Open</i>                                                                                                                                                                                                                                                                                                                                                                                                                                                                                                                                                                                                                                                                                                                                                                                                                                                                                                                                                                                                                                                                                                                        |
| Manuscript ID                 | bmjopen-2019-035186                                                                                                                                                                                                                                                                                                                                                                                                                                                                                                                                                                                                                                                                                                                                                                                                                                                                                                                                                                                                                                                                                                                    |
| Article Type:                 | Protocol                                                                                                                                                                                                                                                                                                                                                                                                                                                                                                                                                                                                                                                                                                                                                                                                                                                                                                                                                                                                                                                                                                                               |
| Date Submitted by the Author: | 23-Oct-2019                                                                                                                                                                                                                                                                                                                                                                                                                                                                                                                                                                                                                                                                                                                                                                                                                                                                                                                                                                                                                                                                                                                            |
| Complete List of Authors:     | Lokken, Erica; University of Washington, Mandaliya, Kishorchandra ; University of Nairobi<br>Srinivasan, Sujatha ; Fred Hutchinson Cancer Research Center, Vaccine and Infectious Diseases Division<br>Richardson, BA; University of Washington, Department of Biostatistics; University of Washington, Department of Global Health<br>Kinuthia, John; Kenyatta National Hospital, Research and Programs; Kenyatta National Hospital, Obstetrics and Gynaecology<br>Lannon, Sophia; Northwest Perinatal<br>Jaoko, Walter; University of Nairobi, Medical Microbiology<br>Alumera, Hudson; University of Nairobi School of Dental Sciences<br>Kemoli, Arthur; University of Nairobi School of Dental Sciences<br>Fay, Emily; University of Washington, Obstetrics and Gynecology<br>John-Stewart, G; University of Washington, Departments of Epidemiology, Global Health, and Medicine<br>Fredricks, DN; Fred Hutchinson Cancer Research Center, Vaccine and Infectious Diseases Division; University of Washington, Medicine<br>McClelland, Scott; University of Washington, Departments of Epidemiology, Global Health, and Medicine |
| Keywords:                     | Epidemiology < INFECTIOUS DISEASES, OBSTETRICS, MICROBIOLOGY                                                                                                                                                                                                                                                                                                                                                                                                                                                                                                                                                                                                                                                                                                                                                                                                                                                                                                                                                                                                                                                                           |
|                               |                                                                                                                                                                                                                                                                                                                                                                                                                                                                                                                                                                                                                                                                                                                                                                                                                                                                                                                                                                                                                                                                                                                                        |

SCHOLARONE™  
Manuscripts

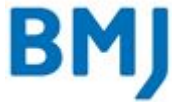

I, the Submitting Author has the right to grant and does grant on behalf of all authors of the Work (as defined in the below author licence), an exclusive licence and/or a non-exclusive licence for contributions from authors who are: i) UK Crown employees; ii) where BMJ has agreed a CC-BY licence shall apply, and/or iii) in accordance with the terms applicable for US Federal Government officers or employees acting as part of their official duties; on a worldwide, perpetual, irrevocable, royalty-free basis to BMJ Publishing Group Ltd ("BMJ") its licensees and where the relevant Journal is co-owned by BMJ to the co-owners of the Journal, to publish the Work in this journal and any other BMJ products and to exploit all rights, as set out in our [licence](#).

The Submitting Author accepts and understands that any supply made under these terms is made by BMJ to the Submitting Author unless you are acting as an employee on behalf of your employer or a postgraduate student of an affiliated institution which is paying any applicable article publishing charge ("APC") for Open Access articles. Where the Submitting Author wishes to make the Work available on an Open Access basis (and intends to pay the relevant APC), the terms of reuse of such Open Access shall be governed by a Creative Commons licence – details of these licences and which [Creative Commons](#) licence will apply to this Work are set out in our licence referred to above.

Other than as permitted in any relevant BMJ Author's Self Archiving Policies, I confirm this Work has not been accepted for publication elsewhere, is not being considered for publication elsewhere and does not duplicate material already published. I confirm all authors consent to publication of this Work and authorise the granting of this licence.

1  
2  
3 **Impact of preconception vaginal microbiota on women's risk of spontaneous preterm**  
4 **birth: Protocol for a prospective case-cohort study**  
5

6 **Authors:**

7 Erica M Lokken<sup>1</sup>  
8 Kishorchandra Mandaliya<sup>2</sup>  
9 Sujatha Srinivasan<sup>3</sup>  
10 Barbra A Richardson<sup>4,5</sup>  
11 John Kinuthia<sup>6,7</sup>  
12 Sophia Lannon<sup>8</sup>  
13 Walter Jaoko<sup>9</sup>  
14 Hudson Alumera<sup>10</sup>  
15 Arthur Kemoli<sup>10</sup>  
16 Emily Fay<sup>11</sup>  
17 Grace John-Stewart<sup>1,5,12</sup>  
18 David N Fredricks<sup>3,12</sup>  
19 R Scott McClelland<sup>1,5,12</sup>  
20  
21

22 **Affiliations:** Department of Epidemiology, University of Washington, Seattle, WA<sup>1</sup>; University of  
23 Nairobi Institute of Tropical & Infectious Diseases (UNITID), Nairobi, Kenya<sup>2</sup>; Vaccine and  
24 Infectious Diseases Division, Fred Hutchinson Cancer Research Center, Seattle, WA<sup>3</sup>;  
25 Department of Biostatistics, University of Washington, Seattle, WA<sup>4</sup>; Department of Global Health,  
26 University of Washington, Seattle, WA<sup>5</sup>; Research and Programs, Kenyatta National Hospital,  
27 Nairobi, Kenya<sup>6</sup>; Obstetrics and Gynaecology, Kenyatta National Hospital, Nairobi, Kenya<sup>7</sup>;  
28 Northwest Perinatal, Portland, OR<sup>8</sup>; Department of Medical Microbiology, University of Nairobi,  
29 Nairobi, Kenya<sup>9</sup>; School of Dental Sciences, University of Nairobi, Nairobi, Kenya<sup>10</sup>; Department  
30 of Obstetrics and Gynecology, University of Washington, Seattle, WA<sup>11</sup>; Department of Medicine,  
31 University of Washington, Seattle, WA<sup>12</sup>  
32  
33

34 **Corresponding Author:**

35 Scott McClelland  
36 University of Washington  
37 Box 359909  
38 325 9<sup>th</sup> Avenue  
39 Seattle, WA 98102  
40 Tel: 206-543-4278  
41 Email: [mccllell@uw.edu](mailto:mccllell@uw.edu)  
42

43 **Word Count-Abstract:** 293/300

44 **Word Count-Main Text:** 3994/4000  
45  
46  
47  
48  
49  
50  
51  
52  
53  
54  
55  
56  
57  
58  
59  
60

## ABSTRACT

### INTRODUCTION

Bacterial vaginosis (BV) and vaginal microbiota disruption during pregnancy are associated with increased risk of spontaneous preterm birth (SPTB), but clinical trials of BV treatment during pregnancy have shown little or no benefit. An alternative hypothesis is that vaginal bacteria present around conception may lead to SPTB by compromising the protective effects of cervical mucus, colonizing the endometrial surface before fetal membrane development, and causing low-level inflammation in the decidua, placenta, and fetal membranes. This protocol describes a prospective case-cohort study addressing this hypothesis.

### METHODS AND ANALYSIS

HIV-seronegative Kenyan women with fertility intent are followed from preconception through pregnancy, delivery, and early postpartum. Participants provide monthly vaginal specimens during the preconception period for vaginal microbiota assessment. Estimated date of delivery is determined by last menstrual period and first trimester obstetrical ultrasound. After delivery, a swab is collected from between the fetal membranes. Placenta and umbilical cord samples are collected for histopathology. Broad-range 16S rRNA gene PCR and deep sequencing of preconception vaginal specimens will assess species richness and diversity in women with SPTB versus term delivery. Concentrations of key bacterial species will be compared using quantitative PCR (qPCR). Taxon-directed qPCR will also be used to quantify bacteria from fetal membrane samples and evaluate the association between bacterial concentrations and histopathological evidence of inflammation in the fetal membranes, placenta, and umbilical cord.

### ETHICS AND DISSEMINATION

This study was approved by ethics committees at Kenyatta National Hospital and the University of Washington. Results will be disseminated to clinicians at study sites and partner institutions,

1  
2  
3 presented at conferences, and published in peer-reviewed journals. The findings of this study  
4  
5 could shift the paradigm for thinking about the mechanisms linking vaginal microbiota and  
6  
7 prematurity by focusing attention on the preconception vaginal microbiota as a mediator of SPTB.  
8  
9  
10  
11  
12  
13  
14  
15  
16  
17  
18  
19  
20  
21  
22  
23  
24  
25  
26  
27  
28  
29  
30  
31  
32  
33  
34  
35  
36  
37  
38  
39  
40  
41  
42  
43  
44  
45  
46  
47  
48  
49  
50  
51  
52  
53  
54  
55  
56  
57  
58  
59  
60

For peer review only

## ARTICLE SUMMARY

### STRENGTHS AND LIMITATIONS OF THIS STUDY

- This prospective case-cohort study enrolls Kenyan women with fertility intent, enabling follow-up and exposure measurement from preconception through pregnancy and the early postpartum period.
- Monthly specimen collection during the preconception period allows for examination of the vaginal microbiota close to the time of conception.
- Fetal membrane swabs and placental samples are collected at delivery, enabling assessment of the association between detection and concentrations of bacteria in the fetal membranes, inflammation, and preterm birth.
- A combination of broad-range 16S rRNA gene PCR with next generation sequencing and quantitative PCR assays provide both the relative and absolute quantities of bacteria in vaginal secretions and in the fetal membranes.
- Because this is an observational study, it cannot definitively establish a causal relationship between vaginal bacteria and preterm birth.

## INTRODUCTION

Globally, approximately 10% of births are preterm (<37 weeks of gestation), but the prevalence can be as high as 18% in low-resource countries [1]. Preterm birth and its sequelae are the leading causes of death among children under five [2]. The majority of preterm deliveries are spontaneous preterm births (SPTB), and occur with or without preterm premature rupture of membranes (PPROM) [3]. The cause of SPTB is often unknown, but up to 40% may be associated with intrauterine infections [3,4]. Other maternal and fetal risk factors include other infections (urinary tract, sexually transmitted, systemic), socio-demographic characteristics (age, race, education) [3], extremes of body mass index [5], periodontal disease [6], pregnancy history (inter-pregnancy interval <6 months, prior SPTB), stress, depression, and smoking [3]. Further elucidation of the causes of SPTB may provide insight into novel approaches for reducing preterm birth risk.

Bacterial vaginosis (BV) is a common vaginal condition characterized by a shift from an optimal *Lactobacillus*-predominant vaginal microbiota to one characterized by high concentrations of diverse anaerobic species [7]. Numerous studies indicate that BV during pregnancy is associated with increased risk of SPTB [8]. However, a meta-analysis of clinical trials concluded that while antibiotic treatment prior to 20 weeks gestation was efficacious for eradicating BV, the risk of SPTB was not substantially reduced [9].

Molecular microbiology has transformed the understanding of vaginal microbiota to a much broader spectrum of phenotypes ranging from low-diversity *Lactobacillus*-dominated bacterial communities to a heterogeneous group of high-diversity BV-associated communities [10,11]. Studies exploring the relationship between the vaginal microbiota and SPTB have yielded conflicting findings. Some found significant associations between increased species diversity and preterm delivery [12–16], while others have not [17–19]. In addition, some studies have found that women with a low relative abundance of *Lactobacillus* species and higher relative abundance of



1  
2  
3 BV-related taxa such as *Gardnerella vaginalis* may be at higher risk of preterm birth [16,19–22].  
4  
5 Others found no association between vaginal bacterial community type and preterm birth  
6  
7 [12,14,17]. Detection and higher concentrations of specific vaginal bacteria have also been  
8  
9 associated with preterm delivery including *Leptotrichia/Sneathia* [16,23], BV-associated  
10  
11 bacterium 1 (BVAB1) [16,23], *Megasphaera* [23], *G. vaginalis* [24,25], *Atopobium vaginae* [24],  
12  
13 TM7-H1 [16], and some *Prevotella* species [16].  
14  
15

16  
17  
18 No previous study has addressed the hypothesis that the preconception vaginal microbiota is  
19  
20 associated with SPTB. Bacteria present around the time of conception could compromise the  
21  
22 protective effects of cervical mucus [26], gaining access to the endometrium before fetal  
23  
24 membrane development [27]. These bacteria could colonize and cause low-level inflammation in  
25  
26 the decidua, placenta, fetal membranes, or amniotic cavity [28,29]. The Microbiota and Preterm  
27  
28 Birth Study (MPTB) was established to enroll HIV-negative Kenyan women trying to become  
29  
30 pregnant into a prospective case-cohort study with frequent vaginal fluid sampling to address the  
31  
32 following aims:  
33

- 34  
35 1) Compare the species diversity and richness of the vaginal microbiota sampled close to  
36  
37 the time of conception in women with SPTB versus term delivery using broad-range 16S  
38  
39 rRNA gene PCR and next generation sequencing.  
40
- 41  
42 2) Compare the presence and concentrations of select bacterial genera/species (based on  
43  
44 published data [23] and results of Aim 1) using targeted qPCR assays in vaginal  
45  
46 specimens sampled close to the time of conception in women with SPTB versus term  
47  
48 births.  
49
- 50  
51 3) Perform species-specific qPCR assays on samples collected from fetal membranes and  
52  
53 histological examination of membranes and umbilical cord to determine if vaginal bacteria  
54  
55 ascend to the upper genital tract and cause inflammation in the fetal membranes and  
56  
57 umbilical cord.  
58  
59  
60

## METHODS AND ANALYSIS

### STUDY DESIGN, SETTING, AND TIMELINE

The MPTB Study is a prospective case-cohort study. Eligible women enroll into a prospective cohort prior to conception and are followed through preconception, pregnancy, delivery, and until six-weeks postpartum; participants will be selected into the case-cohort sample. Study sites are located at Kenyatta National Hospital (KNH) in Nairobi and at Ganjoni Health Center and Coast Provincial General Hospital (CPGH) in Mombasa. Enrollment began in Nairobi in April 2017 and Mombasa in April 2018. Enrollment will continue through approximately June 2019, with final deliveries expected in 2021.

### ELIGIBILITY CRITERIA AND RECRUITMENT STRATEGIES

The target population is HIV-negative women who are currently planning to become pregnant. Additional eligibility criteria include being  $\leq 45$  years old, having had a menstrual period in the prior three months or recently discontinued contraceptive methods that induce amenorrhea (implant, hormonal intrauterine device [IUD], depo medroxyprogesterone acetate injectable [DMPA]), willing to comply with study procedures, and able to provide informed consent. Minors aged 14-17 are eligible if emancipated under Kenyan law. Exclusion criteria include current pregnancy, continuing contraception other than condoms for HIV/STI prevention, having a DMPA injection in the last three months, history of cervical or uterine surgery other than colposcopy, cryotherapy, loop electrosurgical excision procedure, or cesarean section, known autoimmune disease, antibiotic use in the prior four weeks, and history of infertility care-seeking. For women with known HIV-positive male partners, their partner must have a documented undetectable HIV viral load, or the participant must be taking pre-exposure prophylaxis.

1  
2  
3 Participants are recruited by study staff or referred by healthcare providers at sites providing  
4 reproductive or maternal health services. Women discontinuing contraception for the purpose of  
5 becoming pregnant are a key recruitment population.  
6  
7  
8  
9

## 10 11 STUDY VISITS AND PROCEDURES 12

13 Study participation occurs in six phases including screening/enrollment, periodontal examination,  
14 preconception, pregnancy, delivery, and postpartum (Figure 1). Specimen collection, laboratory  
15 testing, and other clinical procedures are summarized in Table 1.  
16  
17  
18  
19  
20  
21

### 22 **Screening and enrollment** 23

24 Following written informed consent for screening, study staff perform urine pregnancy testing and  
25 rapid HIV testing according to Kenyan guidelines [30]. An eligibility interview is conducted in  
26 English or Kiswahili. Eligible women can enroll immediately upon providing consent. If enrollment  
27 does not occur on the screening day, the participant provides another urine sample for pregnancy  
28 testing to re-confirm eligibility prior to enrollment. Enrollees complete a structured face-to-face  
29 interview regarding demographics, sexual behavior, substance use, depression symptoms  
30 (Patient Health Questionnaire-9), and reproductive, contraceptive, and medical history. A study  
31 clinician performs a general physical examination and speculum-assisted pelvic examination. If a  
32 woman is menstruating, the examination is deferred to avoid sampling during this interval when  
33 the vaginal microbiota undergoes rapid changes [31,32]. Two vaginal fluid specimens are  
34 collected by rolling push-off Dacron swabs (FitzCo, Inc) three rotations against the lateral vaginal  
35 wall; these are stored for vaginal microbiota and inflammatory response evaluation. Additional  
36 genital specimens are collected for STI diagnosis [*Neisseria gonorrhoeae*, *Chlamydia*  
37 *trachomatis*, and *Trichomonas vaginalis* by nucleic acid amplification testing (NAAT)], vaginal and  
38 cervical Gram stains, detection of prostate specific antigen (PSA) and elevated sialidase using a  
39  
40  
41  
42  
43  
44  
45  
46  
47  
48  
49  
50  
51  
52  
53  
54  
55  
56  
57  
58  
59  
60

1  
2  
3 point-of-care diagnostic test for BV (Diagnosit BVBLUE, Gryphus Diagnostics). A vaginal  
4 specimen is inoculated onto Rogosa agar for detection of *Lactobacillus*.  
5  
6  
7

8  
9 Syndromic management for STIs is provided following WHO and Kenyan guidelines [33].  
10 Additional therapy is provided at the first preconception visit based on STI NAAT results.  
11  
12 Symptomatic BV is treated according to standard of care [33].  
13  
14  
15

16  
17  
18 Women receive counseling on healthy behaviors during preconception and pregnancy including  
19 smoking cessation, refraining from vaginal washing, and a healthy diet. Study clinicians discuss  
20 participants' menstrual cycle and identify the probable fertile window using calendar-based  
21 methods. Ovulation is estimated to occur 14 days prior to the first day of the next predicted  
22 menses, with the most fertile days emphasized as the five days before and day of ovulation [34].  
23  
24  
25

26 All participants receive prenatal vitamins.  
27  
28  
29

### 30 31 32 **Periodontal Exam**

33  
34 Periodontitis has been associated with SPTB [6] and oral bacteria have been detected in the  
35 placenta of women with SPTB [35]. In this study, periodontal disease is a potential confounding  
36 factor, so each participant receives a periodontal examination. Since pregnancy increases  
37 gingival inflammation [36], examinations occur within four weeks of enrollment. Participants  
38 complete a modified version of the WHO's oral health questionnaire [37] and undergo an oral  
39 examination, including assessment for periodontitis using periodontal pocket depth and clinical  
40 attachment measurements, and Decay-Missing-Filled Index and Gingival Index assessment [37].  
41  
42 Presence and severity of periodontitis are defined using the 2007 Centers for Disease Control  
43 and Prevention/American Academy of Periodontology case definitions [38].  
44  
45  
46  
47  
48  
49  
50  
51  
52  
53  
54  
55  
56  
57  
58  
59  
60

### Monthly Preconception Visits

Participants return at one-month intervals while trying to become pregnant. A structured interview is conducted to update sexual behavior and medical history. Women self-collect vaginal swabs (with assistance if needed) for vaginal microbiota and inflammatory response analysis, vaginal Gram stain, PSA detection, *Lactobacillus* culture, and sialidase detection. Participants with genital symptoms are treated for STIs using syndromic management [33]. Counseling is provided to reinforce messages about healthy preconception behaviors. A urine pregnancy test is performed. Women whose pregnancy test is positive are scheduled for a first trimester visit between nine and twelve weeks of gestation. Most women who remain non-pregnant after six months exit the study; those who discontinued DMPA less than six months prior to enrollment are eligible for nine months of preconception 'trying time' due to delayed return to fertility after DMPA discontinuation [39,40].

### First Trimester Visit (9-12 weeks of gestation)

At the first trimester visit, a structured interview is conducted to update information on sexual behavior and medical history. Women self-collect vaginal swabs for vaginal microbiota and inflammatory response analysis, vaginal Gram stain, PSA detection, and *Lactobacillus* culture. Women undergo an obstetrical ultrasound to confirm gestational age. The ultrasound is conducted by sonographers at KNH in Nairobi and at a private radiology facility in Mombasa (training and quality control described in Table 2). The American College of Obstetrics & Gynecology's 2014 guidelines are used to estimate gestational age if the ultrasound derived estimate differs from that calculated using the last menstrual period (LMP) by more than 7 days before 16 weeks [41]. If a later ultrasound is obtained, the sonographic dates are used if they differ from LMP dates by more than 10 days between 16 and 22 weeks, more than 14 days between 22 and 28 weeks, and more than 21 days after 28 weeks.

1  
2  
3 Pregnant participants are referred to routine antenatal care (ANC) and enrolled into a short  
4 message service (SMS) program to support retention in the study (see '*Retention During*  
5 *Pregnancy*' section). Routinely collected antenatal data (e.g., syphilis test results, blood pressure,  
6 fundal height) are abstracted from participants' ANC facility records and from the Mother and  
7 Child Health Booklet provided to all pregnant Kenyan women.  
8  
9  
10  
11  
12

13  
14  
15  
16 If a participant suffers a miscarriage, management of the pregnancy loss is conducted by non-  
17 study clinicians according to standard of care. Women who miscarry prior to 20 weeks of gestation  
18 may remain in the study if they would like to try for another pregnancy. Women who choose to re-  
19 enter for a second pregnancy attempt are eligible for six additional monthly preconception visits.  
20 Women who miscarry twice are not eligible to return for a third preconception attempt.  
21  
22  
23  
24  
25  
26  
27

### 28 **Retention During Pregnancy**

29  
30 Participants are offered enrollment into an adaptation of an automated two-way SMS program  
31 that was initially designed to support HIV-positive Kenyan women during pregnancy and  
32 postpartum [42]. Messages are sent at 16, 20, and 24 weeks gestation, bi-weekly beginning at 28  
33 weeks, and weekly from 38 weeks through six weeks postpartum. In addition, study nurses call  
34 participants weekly starting at week 35 to confirm pregnancy status and planned delivery location.  
35 Participants are instructed to call at the onset of labor so study staff can coordinate collection of  
36 delivery samples for deliveries at KNH or CPGH, and to assist with identification of the delivery  
37 date for births occurring elsewhere.  
38  
39  
40  
41  
42  
43  
44  
45  
46  
47  
48

### 49 **Delivery Procedures**

50  
51 Deliveries follow standard obstetrical procedures and are not conducted by study staff. Delivery  
52 samples are collected only for births at the Labor and Delivery (L&D) Wards at KNH and CPGH,  
53 where delivery samples are collected by trained L&D nurses (training and quality control  
54  
55  
56  
57  
58  
59  
60

1  
2  
3 described in Table 2). Upon delivery of the placenta by vaginal or caesarean delivery, it is placed  
4 in a sterile container. Samples are collected as soon as feasible and within two hours of delivery.  
5  
6 Using sterile technique, a pair of nurses collects samples from between the amnion and chorion  
7  
8 [43]. A sterile push-off swab (FitzCo, Inc) is collected from between the membranes, placed in a  
9  
10 cryovial, and temporarily stored in a -4°C (Nairobi) or -20°C (Mombasa) freezer in the L&D ward.  
11  
12 The placenta is placed in 10% neutral-buffered formalin. Laboratory staff transport the fetal  
13  
14 membrane swab to a -80°C freezer in study laboratories at KNH and CPGH within one working  
15  
16 day. Laboratory staff also collect placental samples for histopathology. These include a four-  
17  
18 centimeter fetal membrane roll from the ruptured edge of the membranes to the edge of the  
19  
20 placental disc, a one-centimeter section of umbilical cord starting three centimeters from the  
21  
22 placental disc, a one-centimeter block of placenta with overlying membranes adjacent to the  
23  
24 site of cord insertion. All pathological specimens are stored in 10% neutral-buffered formalin.  
25  
26  
27  
28  
29  
30

31 Study staff abstract data from L&D records, including type of delivery (i.e., vaginal or caesarean;  
32  
33 labored or did not labor; spontaneous or induced labor), complications, live birth or stillbirth, and  
34  
35 birthweight.  
36  
37  
38

### 39 **Postpartum Visit**

40  
41 At the six-week postpartum visit, clinicians abstract any ANC and delivery details not previously  
42  
43 captured from the participant's delivery discharge report and Mother & Child Health Booklet.  
44  
45 Participants complete an interview about the infant's health and immunization status.  
46  
47  
48  
49  
50  
51  
52  
53  
54  
55  
56  
57  
58  
59  
60

## Incentives

Participants receive KSh 300 (about \$3.00) at each study visit. Women who become pregnant receive a free obstetrical ultrasound. An incentive of 1000 KSH is provided for deliveries at KNH or CPGH.

## LABORATORY METHODS

### **Microscopy, *Lactobacillus* culture, STI testing, and detection of sialidase and PSA in vaginal fluids**

Vaginal Gram stained slides are evaluated for BV using the criteria developed by Nugent and Hillier [44]. Saline and potassium hydroxide wet mounts are examined for the presence of motile trichomonads, clue cells, yeast, and sperm. Endocervical Gram stained slides are scanned at low power, and polymorphonuclear leukocytes in three nonadjacent oil immersion fields are counted and averaged to evaluate cervical inflammation. Clinicians inoculate vaginal specimens directly on Rogosa agar for detection of cultivable *Lactobacillus* and store the plate in a candle jar until transportation to the laboratory within four hours [45]. Hydrogen peroxide (H<sub>2</sub>O<sub>2</sub>) production is evaluated by subculture of *Lactobacillus* isolates on tetramethylbenzidine (TMB) agar containing horseradish peroxidase [46]. A vaginal specimen is tested for *N. gonorrhoeae*, *C. trachomatis*, and *T. vaginalis* by NAAT (Aptima Combo-2 CT/NG Detection System, Aptima *Trichomonas vaginalis* assay; Hologic Corporation). One vaginal swab is used for detection of sialidase using a commercially available BV diagnostic test (Diagnosit BVBLUE; Gryphus Diagnostics). The minimum detectable level of sialidase is 0.25 µg, and samples above this concentration are considered positive [47]. Testing for PSA in vaginal samples is performed with a commercially available assay (ABAcad, Abacus Diagnostics), which can detect semen for 24-48 hours after condomless sex [48].



### **Molecular methods for identification of bacteria in vaginal and fetal membrane samples**

Stored vaginal and fetal membrane swabs for bacterial PCR will be transported on dry ice to the Fredricks Laboratory at the Fred Hutchinson Cancer Research Center in Seattle, WA. Qiagen QIAamp BiOstic Bacteremia DNA Isolation Kits (Qiagen, Germantown, MD) will be used to extract DNA from vaginal swabs. This protocol uses bead beating and chaotropic lysis to break apart bacterial cells and recover DNA that is free of PCR inhibitors. Swabs that have not contacted a human surface will be processed in parallel to serve as sham DNA extraction (negative) controls. Extracted DNA will be subjected to broad-range 16S rRNA gene PCR using primers that anneal with highly conserved regions of the small subunit rDNA gene, amplifying a 470 base pair segment that contains a highly variable sequence useful for species identification. Bar coded primers will be used to multiplex samples [49]. Libraries of 16S rDNA gene amplicons will be mixed for sequencing on the Illumina MiSeq platform using 300 bp paired-end reads. The assembled reads will be binned into individual study samples using the nucleic acid bar codes. Approximately 10,000-30,000 sequence reads will be generated per sample, providing robust detection of minority species. Raw sequence reads will be demultiplexed using Illumina's on-board bclfastq conversion software v1.8.4 with zero mismatches in either forward or reverse indices. The DADA2 software package will be used to quality control, filter, pair and cluster the amplicon sequence reads [50]. Sequence variants will be assigned taxonomy using the phylogenetic placement tool *ppplacer* [51] and a custom vaginal reference set [11]. Sham extraction controls will also be processed in parallel to exclude bacterial contamination of reagents. Bacterium-specific qPCR assays will also be performed. This study focuses on species hypothesized to be associated with increased risk of SPTB, such as BVAB1, *Megasphaera*, and *Sneathia*. The final set of species/genera tested will be fine-tuned following analysis of the deep sequencing data from Aim 1, selecting additional bacteria based on a comparison of the relative abundance of individual taxa in women with and without SPTB. A standard exogenous jellyfish qPCR amplification control

1  
2  
3 will be used to assess for PCR inhibitors [52]. A broad-range bacterial 16S rDNA gene qPCR  
4 assay will be used to measure total bacterial load in each sample.  
5  
6  
7  
8

### 9 **Histopathological examination of fetal membranes, placenta, and umbilical cord samples**

10 Hematoxylin and eosin staining of fetal membrane rolls, placental samples, and umbilical cord  
11 sections will be graded according to published guidelines by an experienced pathologist (Dr.  
12 Mandaliya) [53]. Acute and subacute inflammatory lesions will be graded and staged for both  
13 maternal and fetal components. Chronic inflammatory lesions will be characterized including any  
14 observation of chronic deciduitis or the presence of decidual plasma cells.  
15  
16  
17  
18  
19  
20  
21  
22  
23

## 24 STATISTICAL ANALYSIS

### 25 **Sample size estimate and case-cohort population generating**

26 Aim 2 requires the largest sample size and was used to guide sample size estimation for the  
27 study. The prospective case-cohort analysis set will include three women who delivered at term  
28 for each one with SPTB. A standard case-control method was employed to compute power [54].  
29 Assuming three primary species/genera of interest, Simes' methodology was utilized to fix a type-  
30 1 error rate adjusted for three tests [55]. A sample of women with 80 SPTB and 240 term births  
31 would provide  $\geq 80\%$  power to detect a statistically significant 2.8-fold or greater difference in the  
32 odds of detecting a preconception vaginal bacterial species/genus in women with SPTB versus  
33 term delivery, assuming  $\geq 10\%$  prevalence of the organism at preconception visits in those  
34 delivering at term.  
35  
36  
37  
38  
39  
40  
41  
42  
43  
44  
45  
46  
47  
48  
49

50 To accrue 80 SPTB cases including women with spontaneous preterm labor or PPROM, a cohort  
51 of approximately 1100 women will be enrolled. Once 80 SPTB cases occur, the sample for the  
52 case-cohort will be defined. First, cases of spontaneous abortion (<20 weeks gestation) and  
53 preterm births without spontaneous labor or PPROM will be excluded. Next, a random sample of  
54  
55  
56  
57  
58  
59  
60

1  
2  
3 the remaining pregnancies will be selected such that, when added to the remaining SPTB cases,  
4 the full case-cohort population will have a term birth to SPTB ratio of 3:1. A sampling fraction  $f$ ,  
5 with  $f$  solved using the formula:  $nf + (1-f)*80=320$ , where  $n$  is the total number of women (cases  
6 and non-cases) with delivery data, will be used to select the random sample. Lastly, all of the  
7 remaining SPTB cases will be added to the random sample, creating the full case-cohort sample.  
8  
9  
10  
11  
12  
13  
14  
15

### 16 **Statistical analysis plan**

17  
18 The goal of Aim 1 is to characterize and compare preconception vaginal species diversity and  
19 richness between women with SPTB versus term birth. All women with SPTB and a random  
20 sample of the same number of women with term birth from the case-cohort sample will be  
21 included. To describe the overall frequency and relative abundance of species, cumulative rank  
22 abundance plots will be generated for each group [56]. We will compare the cumulative  
23 distribution of preconception vaginal bacterial taxa between women with SPTB versus term birth  
24 using the Kolmogorov-Smirnov test. Rarefaction curves will be used to evaluate species richness  
25 (number of taxa at a 97% sequence similarity cutoff defining an operational taxonomic unit) in  
26 women with SPTB versus term birth. Finally, we will assess species diversity (Shannon Diversity  
27 Index [57]) and species richness (Chao1 richness estimator [58]) by comparing the mean values  
28 between women with SPTB versus term birth. We will perform logistic regression with SPTB  
29 status as the outcome and species rank abundance percentage for each species separately. We  
30 will first determine the score statistics (with SPTB status as the outcome) for each variable, then  
31 rank the variables from largest to smallest score statistic. Next, we will perform the logistic  
32 modeling on each of these in rank order of score statistic until we reach a p-value of 0.2 in  
33 univariate logistic regressions. These data will be examined to refine targets for the primary  
34 hypothesis test in Aim 2.  
35  
36  
37  
38  
39  
40  
41  
42  
43  
44  
45  
46  
47  
48  
49  
50  
51  
52  
53  
54  
55  
56  
57  
58  
59  
60

1  
2  
3 For Aim 2, based on the literature and informed by Aim 1 results, bacterial species/genera will be  
4 selected for evaluation using qPCR assays, comparing their presence and concentrations in  
5 vaginal specimens sampled before conception. These analyses will utilize data from the full case-  
6 cohort sample and will be weighted to account for the sampling scheme. For each bacterial taxon,  
7 we will first perform unadjusted logistic regression to examine the association between the  
8 presence of that taxon and the risk of SPTB. Multivariable logistic regression analysis will be used  
9 to determine the independent contributions of bacterial species to the risk of SPTB. Species  
10 associated with SPTB in univariate analyses ( $p < 0.10$ ) will be included in the multivariable model  
11 after addressing collinearity. Potential confounding factors are listed in Table 3. A manual forward  
12 stepwise model building approach will be used to address confounding. For the three species  
13 selected for the primary hypothesis test,  $p < 0.033$  will be considered statistically significant, using  
14 the Simes' correction for multiple comparisons. Other bacterial taxa may be evaluated as  
15 exploratory analyses. Additional exploratory analyses will be performed to investigate the  
16 relationship between preconception quantities of specific bacteria and risk of SPTB.  
17  
18  
19  
20  
21  
22  
23  
24  
25  
26  
27  
28  
29  
30  
31  
32  
33

34 Aim 3 explores the association between bacteria detected in vaginal preconception samples and  
35 fetal membrane samples to further support the role of ascending vaginal bacteria in SPTB. This  
36 analysis will also evaluate the association between bacteria identified in the fetal membranes and  
37 histological evidence of deciduitis, chorioamnionitis, and funisitis. The analysis will use data from  
38 women in the case-cohort sample who contribute delivery samples. There are three different  
39 binary exposures, defined as preconception detection of each of the three vaginal species tested  
40 for the primary hypothesis in Aim 2. The set of binary outcomes includes detection of the same  
41 bacterial species in fetal membranes, deciduitis, chorioamnionitis and funisitis. Odds ratios will be  
42 estimated for each exposure using unadjusted logistic regression models, and multivariable  
43 logistic regression analyses will be utilized to adjust for potential confounding factors (Table 3).  
44  
45  
46  
47  
48  
49  
50  
51  
52  
53  
54  
55  
56  
57  
58  
59  
60

## PATIENT AND PUBLIC INVOLVEMENT

Neither patients nor the public were involved in the design of this research. Healthcare providers providing reproductive/maternal health services and study participants can refer potentially eligible women to the study.

## ETHICS AND DISSEMINATION

This study was approved by the ethics committees at KNH and University of Washington. There are inherent risks to women and fetuses during pregnancy and delivery, but participation in this observational study does not increase these risks. Study participation risks include discomfort associated with the fingerstick for HIV testing, sensitive questions about sexual behavior, and the pelvic examination; stress associated with HIV or STI diagnosis; and breach of confidentiality. To minimize these risks, experienced study staff counsel participants on potential risks and explain that they can withdraw from the study at any time. The risk of breach of confidentiality is minimized by following Good Clinical Practice procedures for data security. Results will be disseminated to clinicians at study sites and partner institutions, presented at conferences, and published in peer-reviewed journals.

## DISCUSSION

Most cases of SPTB occur without a known cause [3]. Bacterial vaginosis during pregnancy is associated with increased risk of SPTB, but clinical trials of BV treatment in pregnancy have shown minimal or no reduction in SPTB [9]. The MPTB Study addresses the hypothesis that the vaginal microbiota detected during the preconception period may be linked to SPTB. The findings could shift the paradigm for thinking about the mechanisms linking vaginal microbiota and preterm birth, and could be used to guide the development and evaluation of interventions aimed at lowering the risk of SPTB by identifying and eradicating high-risk vaginal bacteria prior to conception [59–61].

## REFERENCES

- 1 Beck S, Wojdyla D, Say L, *et al.* The worldwide incidence of preterm birth: a systematic review of maternal mortality and morbidity. *Bull World Health Organ* 2010;**88**:31–8. doi:10.2471/BLT.08.062554
- 2 Liu L, Oza S, Hogan D, *et al.* Global, regional, and national causes of under-5 mortality in 2000–15: an updated systematic analysis with implications for the Sustainable Development Goals. *Lancet* 2016;**388**:3027–35. doi:10.1016/S0140-6736(16)31593-8
- 3 Goldenberg RL, Culhane JF, Iams JD, *et al.* Epidemiology and causes of preterm birth. *Lancet* 2008;**371**:75–84. doi:10.1016/S0140-6736(08)60074-4
- 4 Goldenberg RL, Culhane JF, Johnson DC. Maternal infection and adverse fetal and neonatal outcomes. *Clin Perinatol* 2005;**32**:523–59. doi:10.1016/j.clp.2005.04.006
- 5 Hendler I, Goldenberg RL, Mercer BM, *et al.* The Preterm Prediction study: Association between maternal body mass index and spontaneous and indicated preterm birth. *Am J Obstet Gynecol* 2005;**192**:882–6. doi:10.1016/j.ajog.2004.09.021
- 6 Daalderop LA, Wieland B V., Tomsin K, *et al.* Periodontal disease and pregnancy outcomes: Overview of systematic reviews. *JDR Clin Transl Res* 2018;**3**:10–27. doi:10.1177/2380084417731097
- 7 Hillier S, Mrazek J, Holmes KK. Bacterial Vaginosis. In: Holmes KK, Sparling P, Stamm W, *et al.*, eds. *Sexually Transmitted Infections*. New York, NY: : McGraw Hill Companies 2007. 737–68.
- 8 Leitich H, Kiss H. Asymptomatic bacterial vaginosis and intermediate flora as risk factors for adverse pregnancy outcome. *Best Pract Res Clin Obstet Gynaecol* 2007;**21**:375–90. doi:10.1016/j.bpobgyn.2006.12.005
- 9 Brocklehurst P, Gordon A, Heatley E, *et al.* Antibiotics for treating bacterial vaginosis in pregnancy. *Cochrane Collab* 2013;**1**–123. doi:10.1002/14651858.CD000262.pub4.
- 10 Ravel J, Gajer P, Abdo Z, *et al.* Vaginal microbiome of reproductive-age women. *Proc*

- 1  
2  
3 *Natl Acad Sci* 2011;**108**:4680–7. doi:10.1073/pnas.1002611107
- 4  
5 11 Srinivasan S, Hoffman NG, Morgan MT, *et al*. Bacterial communities in women with  
6 bacterial vaginosis: High resolution phylogenetic analyses reveal relationships of  
7 microbiota to clinical criteria. *PLoS One* 2012;**7**:e37818.  
8  
9 doi:10.1371/journal.pone.0037818  
10  
11  
12 12 Hyman RW, Fukushima M, Jiang H, *et al*. Diversity of the vaginal microbiome correlates  
13 with preterm birth. *Reprod Sci* 2014;**21**:32–40. doi:10.1177/1933719113488838  
14  
15  
16 13 Stout MJ, Zhou Y, Wylie KM, *et al*. Early pregnancy vaginal microbiome trends and  
17 preterm birth. *Am J Obstet Gynecol* 2017;**217**:356.e1-356.e18.  
18  
19 doi:10.1016/j.ajog.2017.05.030  
20  
21  
22 14 Freitas AC, Bocking A, Hill JE, *et al*. Increased richness and diversity of the vaginal  
23 microbiota and spontaneous preterm birth. *Microbiome* 2018;**6**:117. doi:10.1186/s40168-  
24  
25  
26  
27  
28  
29  
30  
31 15 Brown RG, Al-Memar M, Marchesi JR, *et al*. Establishment of vaginal microbiota  
32 composition in early pregnancy and its association with subsequent preterm prelabor  
33 rupture of the fetal membranes. *Transl Res* 2019;**207**:30–43.  
34  
35  
36  
37  
38  
39 16 Fettweis JM, Serrano MG, Brooks JP, *et al*. The vaginal microbiome and preterm birth.  
40  
41  
42  
43  
44 17 Romero R, Hassan SS, Gajer P, *et al*. The vaginal microbiota of pregnant women who  
45 subsequently have spontaneous preterm labor and delivery and those with a normal  
46 delivery at term. *Microbiome* 2014;**2**:18. doi:10.1186/2049-2618-2-18  
47  
48  
49 18 Nelson DB, Shin H, Wu J, *et al*. The gestational vaginal microbiome and spontaneous  
50 preterm birth among nulliparous African American women. *Am J Perinatol* 2016;**33**:887–  
51  
52  
53  
54  
55 93. doi:10.1055/s-0036-1581057  
56  
57 19 Elovitz MA, Gajer P, Riis V, *et al*. Cervicovaginal microbiota and local immune response  
58  
59  
60



- 1  
2  
3 modulate the risk of spontaneous preterm delivery. *Nat Commun* 2019;**10**:1305.  
4  
5 doi:10.1038/s41467-019-09285-9  
6
- 7 20 DiGiulio DB, Callahan BJ, McMurdie PJ, *et al*. Temporal and spatial variation of the  
8 human microbiota during pregnancy. *Proc Natl Acad Sci* 2015;**112**:11060–5.  
9  
10 doi:10.1073/pnas.1502875112  
11
- 12 21 Callahan BJ, DiGiulio DB, Goltsman DSA, *et al*. Replication and refinement of a vaginal  
13 microbial signature of preterm birth in two racially distinct cohorts of US women. *Proc Natl*  
14 *Acad Sci* 2017;**114**:9966–9971. doi:10.1073/pnas.1705899114  
15  
16  
17  
18  
19
- 20 22 Stafford GP, Parker JL, Amabebe E, *et al*. Spontaneous preterm birth is associated with  
21 differential expression of vaginal metabolites by lactobacilli-dominated microflora. *Front*  
22 *Physiol* 2017;**8**:615. doi:10.3389/fphys.2017.00615  
23  
24  
25
- 26 23 Nelson DB, Hanlon A, Nachamkin I, *et al*. Early pregnancy changes in bacterial  
27 vaginosis-associated bacteria and preterm delivery. *Paediatr Perinat Epidemiol*  
28 2014;**28**:88–96. doi:10.1111/ppe.12106  
29  
30  
31
- 32 24 Menard JP, Mazouni C, Salem-Cherif I, *et al*. High vaginal concentrations of *Atopobium*  
33 *vaginae* and *Gardnerella vaginalis* in women undergoing preterm labor. *Obstet Gynecol*  
34 2010;**115**:134–40. doi:10.1097/AOG.0b013e3181c391d7  
35  
36  
37  
38
- 39 25 Nelson DB, Hanlon A, Hassan S, *et al*. Preterm labor and bacterial vaginosis-associated  
40 bacteria among urban women. *J Perinat Med* 2009;**37**:130–4. doi:10.1515/JPM.2009.026  
41  
42
- 43 26 Rahkonen L, Rutanen EM, Unkila-Kallio L, *et al*. Factors affecting matrix  
44 metalloproteinase-8 levels in the vaginal and cervical fluids in the first and second  
45 trimester of pregnancy. *Hum Reprod* 2009;**24**:2693–702. doi:10.1093/humrep/dep284  
46  
47  
48
- 49 27 Andrews WW, Hauth JC, Cliver SP, *et al*. Association of asymptomatic bacterial  
50 vaginosis with endometrial microbial colonization and plasma cell endometritis in  
51 nonpregnant women. *Am J Obstet Gynecol* 2006;**195**:1611–6.  
52  
53  
54  
55  
56  
57  
58  
59  
60



- 1  
2  
3 28 de Andrade Ramos B, Kanninen TT, Sisti G, *et al.* Microorganisms in the female genital  
4 tract during pregnancy: Tolerance versus pathogenesis. *Am J Reprod Immunol*  
5 2015;**73**:383–9. doi:10.1111/aji.12326  
6  
7  
8  
9 29 Prince AL, Antony KM, Chu DM, *et al.* The microbiome, parturition, and timing of birth:  
10 More questions than answers. *J Reprod Immunol* 2014;**104–105**:12–9.  
11  
12 doi:10.1016/j.jri.2014.03.006  
13  
14  
15 30 National AIDS & STD Control Programme. Guidelines on Use of Antiretroviral Drugs for  
16 Treating and Preventing HIV in Kenya. Nairobi, Kenya: 2018.  
17  
18  
19 31 Gajer P, Brotman RM, Bai G, *et al.* Temporal dynamics of the human vaginal microbiota.  
20 *Sci Transl Med* 2012;**4**:132ra52. doi:10.1126/scitranslmed.3003605  
21  
22  
23 32 Srinivasan S, Liu C, Mitchell CM, *et al.* Temporal variability of human vaginal bacteria and  
24 relationship with bacterial vaginosis. *PLoS One* 2010;**5**:e10197.  
25  
26  
27 doi:10.1371/journal.pone.0010197  
28  
29  
30 33 National AIDS & STI Control Programme of Kenya. Kenya National Guidelines for  
31 Prevention, Management and Control of Sexually Transmitted Infections. Nairobi, Kenya:  
32 2018.  
33  
34  
35  
36 34 Lynch CD, Jackson LW, Buck Louis GM. Estimation of the day-specific probabilities of  
37 conception: current state of the knowledge and the relevance for epidemiological  
38 research. *Paediatr Perinat Epidemiol* 2006;**20**:3–12. doi:10.1111/j.1365-3016.2006.00765  
39  
40  
41  
42 43 Prince AL, Ma J, Kannan PS, *et al.* The placental membrane microbiome is altered  
44 among subjects with spontaneous preterm birth with and without chorioamnionitis. *Am J*  
45 *Obstet Gynecol* 2016;**214**:627.e1-627.e16. doi:10.1016/j.ajog.2016.01.193  
46  
47  
48  
49 36 Laine MA. Effect of pregnancy on periodontal and dental health. *Acta Odontol Scand*  
50 2002;**60**:257–64. doi:10.1080/00016350260248210  
51  
52  
53 37 World Health Organization. Oral Health Surveys - Basic Methods: Fifth Edition. Geneva,  
54 Switzerland: 2013.  
55  
56  
57  
58  
59  
60

- 1  
2  
3 38 Page RC, Eke PI. Case definitions for use in population-based surveillance of  
4 periodontitis. *J Periodontol* 2007;**78**:1387–99. doi:10.1902/jop.2007.060264  
5  
6  
7 39 Pardthaisong T, Gray R, McDaniel E. Return of fertility after discontinuation of dept  
8 medroxyprogesterone acetate and intra-uterine devices in northern Thailand. *Lancet*  
9  
10 1980;**315**:509–12. doi:10.1016/s0140-6736(80)92765-8  
11  
12  
13 40 Schwallie P, Assenzo J. The effect of depo-medroxyprogesterone acetate on pituitary  
14 and ovarian function, and the return of fertility following its discontinuation: a review.  
15  
16 *Contraception* 1974;**10**:181–202. doi:10.1016/0010-7824(74)90073-0  
17  
18  
19 41 Committee opinion no 611: Method for estimating due date. *Obs Gynecol* 2014;**124**:863–  
20 6. doi:10.1097/01.AOG.0000454932.15177.be  
21  
22  
23 42 Odeny TA, Newman M, Bukusi EA, *et al*. Developing content for a mHealth intervention  
24 to promote postpartum retention in prevention of mother-to-child HIV transmission  
25 programs and early infant diagnosis of HIV: A qualitative study. *PLoS One*  
26 2014;**9**:e106383. doi:10.1371/journal.pone.0106383  
27  
28  
29 43 Lannon SMR, Adams Waldorf KM, Fiedler T, *et al*. Parallel detection of lactobacillus and  
30 bacterial vaginosis-associated bacterial DNA in the chorioamnion and vagina of pregnant  
31 women at term. *J Matern Neonatal Med* 2019;**32**:2702–10.  
32  
33  
34  
35  
36  
37  
38  
39  
40  
41 44 Nugent RP, Krohn MA, Hillier SL. Reliability of diagnosing bacterial vaginosis is improved  
42 by a standardized method of Gram stain interpretation. *J Clin Microbiol* 1991;**29**:297–301.  
43  
44  
45 45 Martin HL, Richardson BA, Nyange PM, *et al*. Vaginal lactobacilli, microbial flora, and risk  
46 of human immunodeficiency virus type 1 and sexually transmitted disease acquisition. *J*  
47  
48  
49  
50  
51  
52 46 Eschenbach DA, Davick PR, Williams BL, *et al*. Prevalence of hydrogen peroxide-  
53 producing lactobacillus species in normal women and women with bacterial vaginosis. *J*  
54  
55  
56  
57  
58  
59  
60

- 1  
2  
3 47 Gryphus Diagnostics. Diagnosit BV Blue - Rapid Sialidase Test for Bacterial Vaginosis  
4 Package Insert.  
5  
6  
7 48 Hobbs M, Steiner M, Rich K, *et al.* Good performance of rapid prostate-specific antigen  
8 test for detection of semen exposure in women: Implications for qualitative research. *Sex*  
9 *Transm Dis* 2009;**36**:501–6. doi:10.1097/OLQ.0b013e3181a2b4bf  
10  
11  
12  
13 49 Golob JL, Pergam SA, Srinivasan S, *et al.* Stool Microbiota at Neutrophil Recovery Is  
14 Predictive for Severe Acute Graft vs Host Disease after Hematopoietic Cell  
15 Transplantation. *Clin Infect Dis* 2017;**65**:1984–91. doi:10.1093/cid/cix699  
16  
17  
18  
19  
20 50 Callahan BJ, McMurdie PJ, Rosen MJ, *et al.* DADA2: High-resolution sample inference  
21 from Illumina amplicon data. *Nat Methods* 2016;**13**:581–3. doi:10.1038/nmeth.3869  
22  
23  
24 51 Matsen F, Kodner R, Armbrust E. pplacer: linear time maximum-likelihood and Bayesian  
25 phylogenetic placement of sequences onto a fixed reference tree. *BMC Bioinformatics*  
26 2010;**11**:538. doi:10.1186/1471-2105-11-538  
27  
28  
29  
30 52 Khot PD, Ko DL, Hackman RC, *et al.* Development and optimization of quantitative PCR  
31 for the diagnosis of invasive aspergillosis with bronchoalveolar lavage fluid. *BMC Infect*  
32 *Dis* 2008;**8**:73. doi:10.1186/1471-2334-8-73  
33  
34  
35  
36 53 Kraus F, Redline R, Gersell D, *et al.* *Atlas of Nontumor Pathology - Placental Pathology.*  
37 Washington, DC: : American Registry of Pathology 2004.  
38  
39  
40  
41 54 Kim M, Xue X, Du Y. Approaches for calculating power for case-cohort studies.  
42 *Biometrics* 2006;**62**:929–33. doi:10.1111/j.1541-0420.2006.00639\_1.x  
43  
44  
45 55 Simes R. An improved Bonferroni procedure for multiple tests of significance. *Biometrika*  
46 1986;**73**:751–4.  
47  
48  
49 56 Hughes JB, Hellman JJ, Ricketts TH, *et al.* Counting the Uncountable: Statistical  
50 Approaches to Estimating Microbial Diversity. *Appl Environ Microbiol* 2001;**67**:4399–406.  
51 doi:10.1128/AEM.67.10.4399–4406.2001  
52  
53  
54  
55 57 Krebs C. *Ecological Methodology.* New York: : Harper Collins 1989.  
56  
57  
58  
59  
60

- 1  
2  
3 58 Chao A. Non-parametric estimation of the number of classes in a population. *Scand J*  
4 *Stat* 1984;**11**:265–70.  
5  
6  
7 59 McClelland RS, Balkus JE, Lee J, *et al*. Randomized trial of periodic presumptive  
8 treatment with high-dose intravaginal metronidazole and miconazole to prevent vaginal  
9 infections in HIV-negative women. *J Infect Dis* 2015;**211**:1875–82.  
10  
11  
12  
13 doi:10.1093/infdis/jiu818  
14  
15 60 McClelland RS, Richardson BA, Hassan WM, *et al*. Improvement of vaginal health for  
16 Kenyan women at risk for acquisition of human immunodeficiency virus type 1: results of  
17 a randomized trial. *J Infect Dis* 2008;**197**:1361–8. doi:10.1086/587490  
18  
19  
20  
21  
22 61 Sobel JD, Ferris D, Schwebke J, *et al*. Suppressive antibacterial therapy with 0.75%  
23 metronidazole vaginal gel to prevent recurrent bacterial vaginosis. *Am J Obstet Gynecol*  
24 2006;**194**:1283–9. doi:10.1016/j.ajog.2005.11.041  
25  
26  
27  
28 62 Wanyonyi SZ, Napolitano R, Ohuma EO, *et al*. Image-scoring system for crown-rump  
29 length measurement. *Ultrasound Obstet Gynecol* 2014;**44**:649–54.  
30  
31  
32  
33  
34  
35  
36  
37  
38  
39  
40  
41  
42  
43  
44  
45  
46  
47  
48  
49  
50  
51  
52  
53  
54  
55  
56  
57  
58  
59  
60

1  
2  
3 **AUTHORS' CONTRIBUTIONS:** RSM is the principal investigator. RSM and DF generated the  
4 idea for this study and supervised study protocol development and implementation. GJS  
5 contributed to essential elements of the protocol related to recruitment and retention of pregnant  
6 and postpartum women in Kenya. JK and WJ served as site principal investigators, overseeing  
7 study staff and implementation at Kenyatta National Hospital and Ganjoni Health Center. EML,  
8 SL, EF, KM, AK, and HA participated in designing the study, protocol, data collection tools, and  
9 staff training. BAR, RSM, DF, and SS developed the statistical analysis plan for the study. DF,  
10 SS, and KM oversaw laboratory methods. EML coordinates the study and wrote the first draft of  
11 the manuscript. All authors reviewed and approved the final manuscript.  
12  
13  
14  
15  
16  
17  
18  
19  
20  
21  
22  
23

24 **FUNDING STATEMENT:** This work was supported by a National Institutes of Health grant  
25 (NICHD R01 HD087346-RSM). RSM received additional support for mentoring (NICHD K24  
26 HD88229). EML was supported by a pre-doctoral fellowship (NIAID T32 AI07140-Lukehart). Data  
27 collection and management are made possible using REDCap electronic data capture tools  
28 hosted at the University of Washington's Institute of Translational Health Science supported by  
29 grants from NCATS/NIH (UL1 TR002319, KL2 TR002317, and TL1 TR002318).  
30  
31  
32  
33  
34  
35  
36  
37  
38

39 **COMPETING INTERESTS STATEMENT:** RSM has received honoraria for consulting from Lupin  
40 Pharmaceuticals and receives research funding, paid to the University of Washington, from  
41 Hologic Corporation.  
42  
43  
44  
45  
46

47 **ACKNOWLEDGEMENTS:** We would like to acknowledge the clinic, laboratory, and  
48 administrative study staff in Nairobi, Mombasa, and Seattle for their dedication and teamwork.  
49 We are also grateful to Kenyatta National Hospital, Coast Provincial General Hospital, and the  
50 Mombasa County Department of Health for supporting this research and providing clinical and  
51 laboratory space. We thank the study participants whose commitment has made the ongoing  
52  
53  
54  
55  
56  
57  
58  
59  
60

1  
2  
3 implementation of this protocol possible. Development and implementation of the ultrasound  
4 quality assurance measures has been generously and skillfully supported by Dr. Robert Nathan  
5 (University of Washington) and Dr. Christine Mamai (Kenyatta National Hospital). Lastly, the  
6 authors thank Dr. Anne Pulei, Dr. Lydia Okutoyi, Raheli Mukhwana and Grace Wang'ombe  
7 (Kenyatta National Hospital), Charity Muthoni and Josephine Mwangi (Coast Provincial General  
8 Hospital), and the labor and delivery nurses at KNH and CPGH for their contributions to the  
9 successful training, oversight, and implementation of delivery sample collection.  
10  
11  
12  
13  
14  
15  
16  
17  
18  
19  
20  
21  
22  
23  
24  
25  
26  
27  
28  
29  
30  
31  
32  
33  
34  
35  
36  
37  
38  
39  
40  
41  
42  
43  
44  
45  
46  
47  
48  
49  
50  
51  
52  
53  
54  
55  
56  
57  
58  
59  
60

1  
2  
3 **Figure Title & Caption:**  
4

5 **Figure 1. Microbiota and Preterm Birth Study Phases** – Additional participant pathways: 1)  
6 Participants who discontinued DMPA injectable contraception within 6 months of study enrollment  
7 are eligible for 9 months of preconception follow-up. 2) Participants who miscarry are eligible to  
8 re-enter preconception follow-up for a second pregnancy attempt.  
9

10  
11  
12  
13  
14  
15  
16  
17  
18  
19  
20  
21  
22  
23  
24  
25  
26  
27  
28  
29  
30  
31  
32  
33  
34  
35  
36  
37  
38  
39  
40  
41  
42  
43  
44  
45  
46  
47  
48  
49  
50  
51  
52  
53  
54  
55  
56  
57  
58  
59  
60

For peer review only

**Table 1. Specimen collection, laboratory testing, and other procedures by study visit**

| Procedure Type                                                        | Screening | Enrollment | Periodontal Exam | Pre-conception | 9-12 Week Gestation | Delivery <sup>i</sup> | Postpartum |
|-----------------------------------------------------------------------|-----------|------------|------------------|----------------|---------------------|-----------------------|------------|
| <b>Specimen Collection</b>                                            |           |            |                  |                |                     |                       |            |
| Urine pregnancy test                                                  | X         | X          |                  | X              |                     |                       |            |
| Genital swabs                                                         |           |            |                  |                |                     |                       |            |
| APTIMA swab                                                           |           | X          |                  |                |                     |                       |            |
| Push-off swabs <sup>ii</sup>                                          |           | X          |                  | X              | X                   |                       |            |
| Cotton & Dacron swabs                                                 |           | X          |                  | X              | X                   |                       |            |
| Sialidase test swab                                                   |           | X          |                  | X              |                     |                       |            |
| Fetal membrane swab                                                   |           |            |                  |                |                     | X                     |            |
| Placental punch                                                       |           |            |                  |                |                     | X                     |            |
| Fetal membrane roll                                                   |           |            |                  |                |                     | X                     |            |
| Umbilical cord                                                        |           |            |                  |                |                     | X                     |            |
| <b>Laboratory Testing</b>                                             |           |            |                  |                |                     |                       |            |
| HIV Rapid Test                                                        | X         |            |                  |                |                     |                       |            |
| <i>N. gonorrhoeae</i> , <i>C. trachomatis</i> , & <i>T. vaginalis</i> |           | X          |                  |                |                     |                       |            |
| Cervical Gram stain                                                   |           | X          |                  |                |                     |                       |            |
| Vaginal pH                                                            |           | X          |                  |                |                     |                       |            |
| Vaginal wet mount                                                     |           | X          |                  |                |                     |                       |            |
| Vaginal Gram stain                                                    |           | X          |                  | X              | X                   |                       |            |
| <i>Lactobacillus</i> culture <sup>iii</sup>                           |           | X          |                  | X              | X                   |                       |            |
| Sialidase test                                                        |           | X          |                  | X              |                     |                       |            |
| PSA test                                                              |           | X          |                  | X              | X                   |                       |            |
| <b>Participant Questionnaires</b>                                     |           |            |                  |                |                     |                       |            |
| Eligibility screen                                                    | X         |            |                  |                |                     |                       |            |
| Demographics                                                          |           | X          |                  |                |                     |                       |            |
| Reproductive history                                                  |           | X          |                  |                |                     |                       |            |
| Medical history & current symptoms                                    |           | X          |                  | X              | X                   |                       |            |
| Sexual behavior                                                       |           | X          |                  | X              | X                   |                       |            |
| Substance use                                                         |           | X          |                  | X              | X                   |                       |            |
| Dental health history                                                 |           |            | X                |                |                     |                       |            |
| Neonatal health                                                       |           |            |                  |                |                     |                       | X          |
| <b>Obstetric Ultrasound</b>                                           |           |            |                  |                | X                   |                       |            |



1  
2  
3  
4  
5  
6  
7  
8  
9  
10  
11  
12  
13  
14  
15  
16  
17  
18  
19  
20  
21  
22  
23  
24  
25  
26  
27  
28  
29  
30  
31  
32  
33  
34  
35  
36  
37  
38  
39  
40  
41  
42  
43  
44  
45  
46  
47

---

Abbreviations: PSA-prostate specific antigen

<sup>i</sup> Delivery follows standard obstetrical procedure and is not conducted by study staff

<sup>ii</sup> Storing for vaginal microbiota and vaginal inflammatory response testing

<sup>iii</sup> Rogosa agar, followed by sub-culture for hydrogen peroxide production on tetramethylbenzidine agar containing horseradish peroxidase

For peer review only

**Table 2. Periodontal examination, first trimester obstetric ultrasound, and fetal membrane sample training and continuous quality control procedures**

| Procedure                                   | Initial Training                                                                                                                                                                                                                                                                                                                                 | Continuous Quality Control Procedures                                                                                                                                                                                                                                                                                                                                                                                                                                                                                                                                                                                                                                                                                                                                                                                       |
|---------------------------------------------|--------------------------------------------------------------------------------------------------------------------------------------------------------------------------------------------------------------------------------------------------------------------------------------------------------------------------------------------------|-----------------------------------------------------------------------------------------------------------------------------------------------------------------------------------------------------------------------------------------------------------------------------------------------------------------------------------------------------------------------------------------------------------------------------------------------------------------------------------------------------------------------------------------------------------------------------------------------------------------------------------------------------------------------------------------------------------------------------------------------------------------------------------------------------------------------------|
| <b>Periodontal examination</b>              | <ul style="list-style-type: none"> <li>The UoN periodontist conducted an in-person training with the CPGH dentist that included teaching, observation, and calibration.</li> </ul>                                                                                                                                                               | <ul style="list-style-type: none"> <li>Inter-examiner calibration bi-annually - The UoN periodontist and a second UoN experienced periodontist conduct periodontal exams on a series of patients to compare results. The UoN periodontist serves as the gold standard comparator for the CPGH dentist.</li> <li>Intra-examiner calibration once per 50 examinations – Examination is repeated on one participant to compare results between the first and second examination.</li> </ul>                                                                                                                                                                                                                                                                                                                                    |
| <b>First Trimester Obstetric Ultrasound</b> | <ul style="list-style-type: none"> <li>All sonographers received a standardized refresher training on ultrasound determination of gestational age, early pregnancy complications, and MPTB study specific procedures by the Kenyan study radiologist.</li> </ul>                                                                                 | <ul style="list-style-type: none"> <li>For each participant with a first trimester ultrasound, an image of the crown rump length is saved and quality is assessed by the study radiologist according to criteria developed for the International Fetal and Newborn Growth Consortium for the 21st Century [62]. (For participants with a crown rump length measurement of &gt;84mm, images are not saved and gestational age is assessed using biometric measurements.)</li> <li>Sonographers access the results of quality assessments for ongoing feedback.</li> <li>Annually, sonographers in Nairobi meet with the study radiologist to review quality metrics and receive refresher training on study procedures. The radiologist provides ongoing one-on-one support to the Mombasa sonographers by phone.</li> </ul> |
| <b>Fetal Membrane Sample</b>                | <ul style="list-style-type: none"> <li>Initial training of labor and delivery nurses and KNH based Kenyan obstetrician was performed by Dr. Lannon, who developed the fetal membrane collection technique [43].</li> <li>Trainees were required to demonstrate proficient sample collection technique and verbalize study procedures.</li> </ul> | <ul style="list-style-type: none"> <li>Subsequent trainings are conducted as needed and led by a Kenyan obstetrician-gynecologist based at KNH who participated in the initial training.</li> </ul>                                                                                                                                                                                                                                                                                                                                                                                                                                                                                                                                                                                                                         |

1  
2  
3  
4  
5  
6  
7  
8  
9  
10  
11  
12  
13  
14  
15  
16  
17  
18  
19  
20  
21  
22  
23  
24  
25  
26  
27  
28  
29  
30  
31  
32  
33  
34  
35  
36  
37  
38  
39  
40  
41  
42  
43  
44  
45  
46  
47

**Table 3. Potential key covariates in analysis of the association between preconception vaginal microbiota and spontaneous preterm birth**

| Variable                                                                                          | Timing                     | Method                                                                                                                       |
|---------------------------------------------------------------------------------------------------|----------------------------|------------------------------------------------------------------------------------------------------------------------------|
| <b>Demographics</b>                                                                               |                            |                                                                                                                              |
| Maternal Age                                                                                      | Baseline                   | FTFI                                                                                                                         |
| Educational level                                                                                 | Baseline                   | FTFI                                                                                                                         |
| Socioeconomic status                                                                              | Baseline                   | FTFI                                                                                                                         |
| Obstetrical history (e.g., number of pregnancies, time since last pregnancy, prior preterm birth) | Baseline                   | FTFI                                                                                                                         |
| Prior contraceptive history                                                                       | Baseline                   | FTFI                                                                                                                         |
| <b>Current pregnancy</b>                                                                          |                            |                                                                                                                              |
| Maternal hemoglobin level, blood pressure                                                         | Throughout pregnancy       | ANC records                                                                                                                  |
| Fetal health (e.g., Apgar scores, spontaneous breathing, birthweight, gender)                     | Delivery                   | Delivery records, FTFI or phone interview                                                                                    |
| Maternal infection                                                                                | Throughout pregnancy       | ANC and delivery records, FTFI or phone interview                                                                            |
| Maternal pregnancy complications                                                                  | Throughout pregnancy       | ANC and delivery records, FTFI or phone interview                                                                            |
| <b>General health status</b>                                                                      |                            |                                                                                                                              |
| Body mass index                                                                                   | Baseline                   | Measure weight & height                                                                                                      |
| Smoking                                                                                           | Baseline & follow-up       | FTFI                                                                                                                         |
| Alcohol use                                                                                       | Baseline & follow-up       | Alcohol use disorders identification test (AUDIT)                                                                            |
| Depressive symptoms                                                                               | Baseline                   | Patient health questionnaire-9 (PHQ-9)                                                                                       |
| Periodontitis                                                                                     | Within 4 weeks of baseline | Oral examination                                                                                                             |
| Genital tract infection/STI                                                                       | Baseline                   | Detection of gonorrhoea, chlamydia, and <i>T. vaginalis</i> by NAAT (Hologic).<br>Wet prep, vaginal and cervical Gram stain. |
| <i>Lactobacilli</i>                                                                               | Baseline & follow-up       | Culture on Rogosa and TMB agar                                                                                               |
| Unprotected sex                                                                                   | Baseline & follow-up       | FTFI                                                                                                                         |
| Prostate specific antigen                                                                         | Baseline & follow-up       | ABACard PSA Detection (Abacus Diagnostics)                                                                                   |
| Intravaginal practices                                                                            | Baseline & follow-up       | FTFI                                                                                                                         |

Abbreviations: ANC-antenatal clinic; FTFI-face-to-face interview; NAAT-nucleic acid amplification test; PHQ-9-patient health questionnaire version 9; PSA-prostate specific antigen; TMB-tetramethylbenzidine; STI-sexually transmitted infections

1  
2  
3  
4  
5  
6  
7  
8  
9  
10  
11  
12  
13  
14  
15  
16  
17  
18  
19  
20  
21  
22  
23  
24  
25  
26  
27  
28  
29  
30  
31  
32  
33  
34  
35  
36  
37  
38  
39  
40  
41  
42  
43  
44  
45  
46  
47

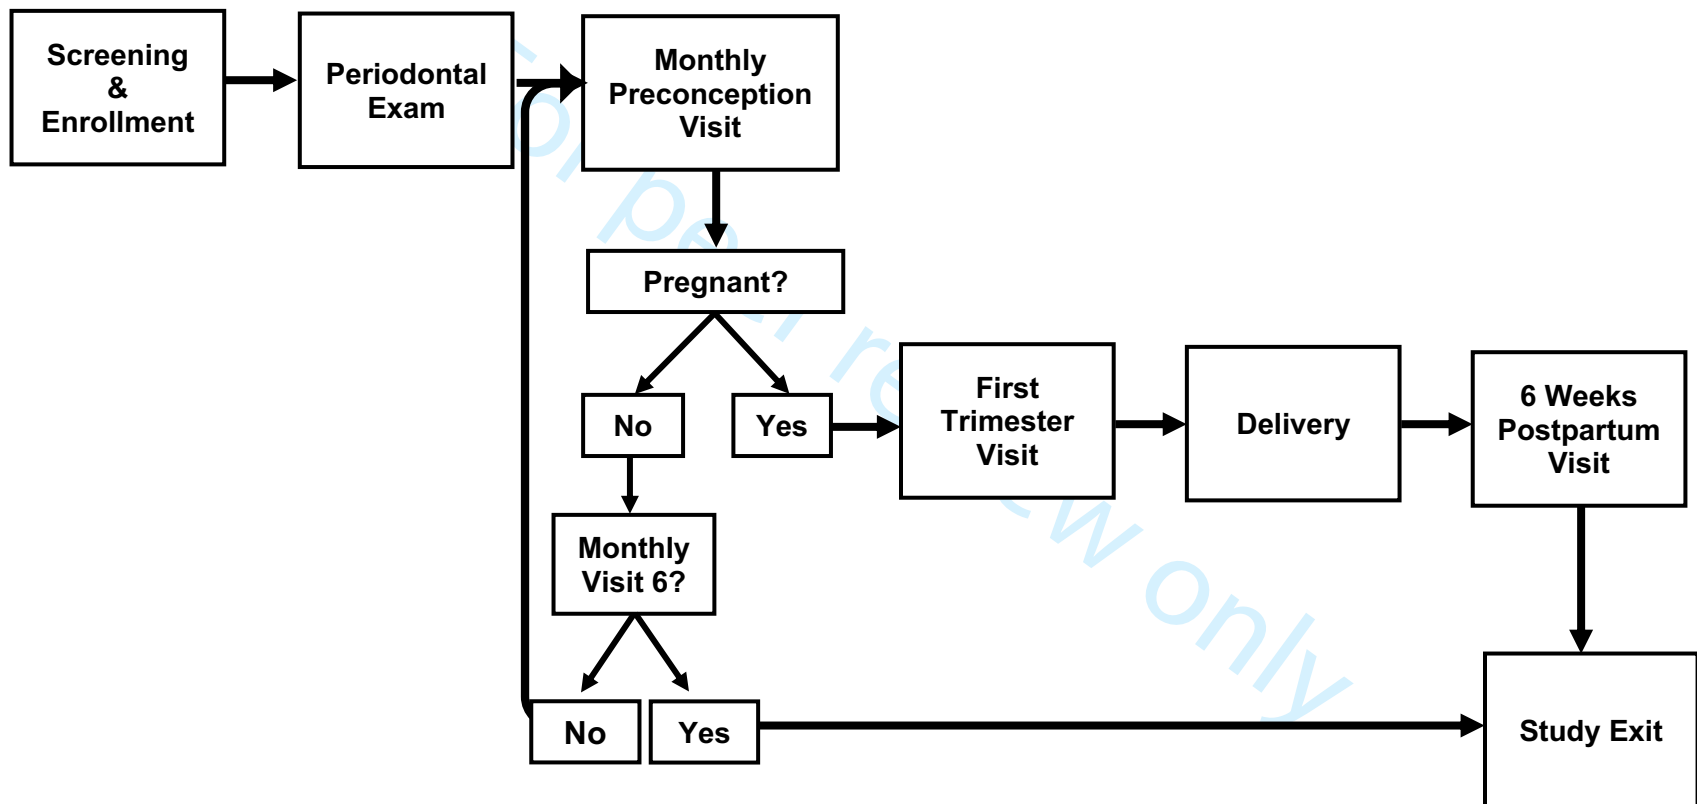

# BMJ Open

## Impact of preconception vaginal microbiota on women's risk of spontaneous preterm birth: Protocol for a prospective case-cohort study

|                                 |                                                                                                                                                                                                                                                                                                                                                                                                                                                                                                                                                                                                                                                                                                                                                                                                                                                                                                                                                                                                                                                                                                                                        |
|---------------------------------|----------------------------------------------------------------------------------------------------------------------------------------------------------------------------------------------------------------------------------------------------------------------------------------------------------------------------------------------------------------------------------------------------------------------------------------------------------------------------------------------------------------------------------------------------------------------------------------------------------------------------------------------------------------------------------------------------------------------------------------------------------------------------------------------------------------------------------------------------------------------------------------------------------------------------------------------------------------------------------------------------------------------------------------------------------------------------------------------------------------------------------------|
| Journal:                        | <i>BMJ Open</i>                                                                                                                                                                                                                                                                                                                                                                                                                                                                                                                                                                                                                                                                                                                                                                                                                                                                                                                                                                                                                                                                                                                        |
| Manuscript ID                   | bmjopen-2019-035186.R1                                                                                                                                                                                                                                                                                                                                                                                                                                                                                                                                                                                                                                                                                                                                                                                                                                                                                                                                                                                                                                                                                                                 |
| Article Type:                   | Protocol                                                                                                                                                                                                                                                                                                                                                                                                                                                                                                                                                                                                                                                                                                                                                                                                                                                                                                                                                                                                                                                                                                                               |
| Date Submitted by the Author:   | 07-Dec-2019                                                                                                                                                                                                                                                                                                                                                                                                                                                                                                                                                                                                                                                                                                                                                                                                                                                                                                                                                                                                                                                                                                                            |
| Complete List of Authors:       | Lokken, Erica; University of Washington, Mandaliya, Kishorchandra ; University of Nairobi<br>Srinivasan, Sujatha ; Fred Hutchinson Cancer Research Center, Vaccine and Infectious Diseases Division<br>Richardson, BA; University of Washington, Department of Biostatistics; University of Washington, Department of Global Health<br>Kinuthia, John; Kenyatta National Hospital, Research and Programs; Kenyatta National Hospital, Obstetrics and Gynaecology<br>Lannon, Sophia; Northwest Perinatal<br>Jaoko, Walter; University of Nairobi, Medical Microbiology<br>Alumera, Hudson; University of Nairobi School of Dental Sciences<br>Kemoli, Arthur; University of Nairobi School of Dental Sciences<br>Fay, Emily; University of Washington, Obstetrics and Gynecology<br>John-Stewart, G; University of Washington, Departments of Epidemiology, Global Health, and Medicine<br>Fredricks, DN; Fred Hutchinson Cancer Research Center, Vaccine and Infectious Diseases Division; University of Washington, Medicine<br>McClelland, Scott; University of Washington, Departments of Epidemiology, Global Health, and Medicine |
| <b>Primary Subject Heading</b>: | Obstetrics and gynaecology                                                                                                                                                                                                                                                                                                                                                                                                                                                                                                                                                                                                                                                                                                                                                                                                                                                                                                                                                                                                                                                                                                             |
| Secondary Subject Heading:      | Global health, Infectious diseases, Epidemiology                                                                                                                                                                                                                                                                                                                                                                                                                                                                                                                                                                                                                                                                                                                                                                                                                                                                                                                                                                                                                                                                                       |
| Keywords:                       | Epidemiology < INFECTIOUS DISEASES, OBSTETRICS, MICROBIOLOGY                                                                                                                                                                                                                                                                                                                                                                                                                                                                                                                                                                                                                                                                                                                                                                                                                                                                                                                                                                                                                                                                           |
|                                 |                                                                                                                                                                                                                                                                                                                                                                                                                                                                                                                                                                                                                                                                                                                                                                                                                                                                                                                                                                                                                                                                                                                                        |

SCHOLARONE™  
Manuscripts



I, the Submitting Author has the right to grant and does grant on behalf of all authors of the Work (as defined in the below author licence), an exclusive licence and/or a non-exclusive licence for contributions from authors who are: i) UK Crown employees; ii) where BMJ has agreed a CC-BY licence shall apply, and/or iii) in accordance with the terms applicable for US Federal Government officers or employees acting as part of their official duties; on a worldwide, perpetual, irrevocable, royalty-free basis to BMJ Publishing Group Ltd ("BMJ") its licensees and where the relevant Journal is co-owned by BMJ to the co-owners of the Journal, to publish the Work in this journal and any other BMJ products and to exploit all rights, as set out in our [licence](#).

The Submitting Author accepts and understands that any supply made under these terms is made by BMJ to the Submitting Author unless you are acting as an employee on behalf of your employer or a postgraduate student of an affiliated institution which is paying any applicable article publishing charge ("APC") for Open Access articles. Where the Submitting Author wishes to make the Work available on an Open Access basis (and intends to pay the relevant APC), the terms of reuse of such Open Access shall be governed by a Creative Commons licence – details of these licences and which [Creative Commons](#) licence will apply to this Work are set out in our licence referred to above.

Other than as permitted in any relevant BMJ Author's Self Archiving Policies, I confirm this Work has not been accepted for publication elsewhere, is not being considered for publication elsewhere and does not duplicate material already published. I confirm all authors consent to publication of this Work and authorise the granting of this licence.

1  
2  
3 **Impact of preconception vaginal microbiota on women's risk of spontaneous preterm**  
4 **birth: Protocol for a prospective case-cohort study**  
5

6 **Authors:**

7 Erica M Lokken<sup>1</sup>  
8 Kishorchandra Mandaliya<sup>2</sup>  
9 Sujatha Srinivasan<sup>3</sup>  
10 Barbra A Richardson<sup>4,5</sup>  
11 John Kinuthia<sup>6,7</sup>  
12 Sophia Lannon<sup>8</sup>  
13 Walter Jaoko<sup>9</sup>  
14 Hudson Alumera<sup>10</sup>  
15 Arthur Kemoli<sup>10</sup>  
16 Emily Fay<sup>11</sup>  
17 Grace John-Stewart<sup>1,5,12</sup>  
18 David N Fredricks<sup>3,12</sup>  
19 R Scott McClelland<sup>1,5,12</sup>  
20  
21

22 **Affiliations:** Department of Epidemiology, University of Washington, Seattle, WA<sup>1</sup>; University of  
23 Nairobi Institute of Tropical & Infectious Diseases (UNITID), Nairobi, Kenya<sup>2</sup>; Vaccine and  
24 Infectious Diseases Division, Fred Hutchinson Cancer Research Center, Seattle, WA<sup>3</sup>;  
25 Department of Biostatistics, University of Washington, Seattle, WA<sup>4</sup>; Department of Global Health,  
26 University of Washington, Seattle, WA<sup>5</sup>; Research and Programs, Kenyatta National Hospital,  
27 Nairobi, Kenya<sup>6</sup>; Obstetrics and Gynaecology, Kenyatta National Hospital, Nairobi, Kenya<sup>7</sup>;  
28 Northwest Perinatal, Portland, OR<sup>8</sup>; Department of Medical Microbiology, University of Nairobi,  
29 Nairobi, Kenya<sup>9</sup>; School of Dental Sciences, University of Nairobi, Nairobi, Kenya<sup>10</sup>; Department  
30 of Obstetrics and Gynecology, University of Washington, Seattle, WA<sup>11</sup>; Department of Medicine,  
31 University of Washington, Seattle, WA<sup>12</sup>  
32  
33

34 **Corresponding Author:**

35 Scott McClelland  
36 University of Washington  
37 Box 359909  
38 325 9<sup>th</sup> Avenue  
39 Seattle, WA 98102  
40 Tel: 206-543-4278  
41 Email: [mccllell@uw.edu](mailto:mccllell@uw.edu)  
42

43 **Word Count-Abstract:** 293/300

44 **Word Count-Main Text:** 3988/4000  
45  
46  
47  
48  
49  
50  
51  
52  
53  
54  
55  
56  
57  
58  
59  
60

## ABSTRACT

### INTRODUCTION

Bacterial vaginosis (BV) and vaginal microbiota disruption during pregnancy are associated with increased risk of spontaneous preterm birth (SPTB), but clinical trials of BV treatment during pregnancy have shown little or no benefit. An alternative hypothesis is that vaginal bacteria present around conception may lead to SPTB by compromising the protective effects of cervical mucus, colonizing the endometrial surface before fetal membrane development, and causing low-level inflammation in the decidua, placenta, and fetal membranes. This protocol describes a prospective case-cohort study addressing this hypothesis.

### METHODS AND ANALYSIS

HIV-seronegative Kenyan women with fertility intent are followed from preconception through pregnancy, delivery, and early postpartum. Participants provide monthly vaginal specimens during the preconception period for vaginal microbiota assessment. Estimated date of delivery is determined by last menstrual period and first trimester obstetrical ultrasound. After delivery, a swab is collected from between the fetal membranes. Placenta and umbilical cord samples are collected for histopathology. Broad-range 16S rRNA gene PCR and deep sequencing of preconception vaginal specimens will assess species richness and diversity in women with SPTB versus term delivery. Concentrations of key bacterial species will be compared using quantitative PCR (qPCR). Taxon-directed qPCR will also be used to quantify bacteria from fetal membrane samples and evaluate the association between bacterial concentrations and histopathological evidence of inflammation in the fetal membranes, placenta, and umbilical cord.

### ETHICS AND DISSEMINATION

This study was approved by ethics committees at Kenyatta National Hospital and the University of Washington. Results will be disseminated to clinicians at study sites and partner institutions,



1  
2  
3 presented at conferences, and published in peer-reviewed journals. The findings of this study  
4  
5 could shift the paradigm for thinking about the mechanisms linking vaginal microbiota and  
6  
7 prematurity by focusing attention on the preconception vaginal microbiota as a mediator of SPTB.  
8  
9  
10  
11  
12  
13  
14  
15  
16  
17  
18  
19  
20  
21  
22  
23  
24  
25  
26  
27  
28  
29  
30  
31  
32  
33  
34  
35  
36  
37  
38  
39  
40  
41  
42  
43  
44  
45  
46  
47  
48  
49  
50  
51  
52  
53  
54  
55  
56  
57  
58  
59  
60

For peer review only

## ARTICLE SUMMARY

### STRENGTHS AND LIMITATIONS OF THIS STUDY

- This prospective case-cohort study enrolls Kenyan women with fertility intent, enabling follow-up and exposure measurement from preconception through pregnancy and the early postpartum period.
- Monthly specimen collection during the preconception period allows for examination of the vaginal microbiota close to the time of conception.
- Fetal membrane swabs and placental samples are collected at delivery, enabling assessment of the association between detection and concentrations of bacteria in the fetal membranes, inflammation, and preterm birth.
- A combination of broad-range 16S rRNA gene PCR with next generation sequencing and quantitative PCR assays provide both the relative and absolute quantities of bacteria in vaginal secretions and in the fetal membranes.
- Because this is an observational study, it cannot definitively establish a causal relationship between vaginal bacteria and preterm birth.

## INTRODUCTION

Globally, approximately 10% of births are preterm (<37 weeks of gestation), but the prevalence can be as high as 18% in low-resource countries [1]. Preterm birth and its sequelae are the leading causes of death among children under five [2]. The majority of preterm deliveries are spontaneous preterm births (SPTB) [3]. The cause of SPTB is often unknown, but up to 40% may be associated with intrauterine infections [3,4]. Other risk factors include other infections (urinary tract, sexually transmitted, systemic), socio-demographic characteristics (age, race, education) [3], extremes of body mass index [5], periodontal disease [6], inter-pregnancy interval <6 months, prior SPTB, stress, depression, and smoking [3]. Further elucidation of the causes may provide insight into novel approaches for reducing SPTB.

Bacterial vaginosis (BV) is a common vaginal condition characterized by a shift from an optimal *Lactobacillus*-predominant vaginal microbiota to one characterized by high concentrations of diverse anaerobic species [7]. Numerous studies indicate that BV during pregnancy is associated with increased risk of SPTB [8]. However, a meta-analysis of clinical trials concluded that while antibiotic treatment prior to 20 weeks gestation successfully treated BV, the risk of SPTB was not substantially reduced [9].

Molecular microbiology has transformed the understanding of vaginal microbiota to a broader spectrum of phenotypes ranging from low-diversity *Lactobacillus*-dominated bacterial communities to a heterogeneous group of high-diversity BV-associated communities [10,11]. Studies exploring the relationship between the vaginal microbiota and SPTB have yielded conflicting findings. Some found significant associations between increased species diversity and preterm birth [12–16], while others have not [17–19]. In addition, some studies have found that women with a low relative abundance of *Lactobacillus* species and higher relative abundance of BV-related taxa may be at higher risk of preterm birth [16,19–22]. Others found no association

1  
2  
3 between vaginal bacterial community type and preterm birth [12,14,17]. Detection and higher  
4 concentrations of specific vaginal bacteria have also been associated with preterm birth including  
5  
6  
7 *Leptotrichia/Sneathia* [16,23], BV-associated bacterium 1 (BVAB1) [16,23], *Megasphaera* [23],  
8  
9 *Gardnerella vaginalis* [24,25], *Atopobium vaginae* [24], TM7-H1 [16], and some *Prevotella* species  
10  
11 [16].  
12  
13  
14  
15

16 A novel hypothesis to explain the lack of success of BV treatment during pregnancy on SPTB risk  
17 is that preconception vaginal microbiota may be a more important risk factor for SPTB than vaginal  
18 bacteria during pregnancy. Vaginal bacteria present around the time of conception could  
19  
20 compromise the protective effects of cervical mucus [26], gaining access to the endometrium  
21  
22 before embryo implantation, formation of the cervical mucus plug, and development of the fetal  
23  
24 membrane. These bacteria could colonize and cause chronic, low-level inflammation in the  
25  
26 decidua, placenta, fetal membranes, or amniotic cavity [27,28]. In this scenario, antibiotic  
27  
28 treatment during pregnancy may be too late to influence a woman's risk of SPTB associated with  
29  
30 intrauterine bacteria.  
31  
32  
33  
34  
35  
36

37 The Microbiota and Preterm Birth Study (MPTB) enrolls HIV-negative Kenyan women trying to  
38  
39 become pregnant into a prospective case-cohort study to address the following aims:  
40

- 41 1) Compare the species diversity and richness of the vaginal microbiota sampled close to  
42 the time of conception in women with SPTB versus term delivery using broad-range 16S  
43 rRNA gene PCR and next generation sequencing.  
44  
45
- 46 2) Compare the presence and concentrations of select bacterial genera/species (based on  
47 published data [23] and results of Aim 1) using targeted qPCR assays in vaginal  
48 specimens sampled close to the time of conception in women with SPTB versus term  
49  
50  
51  
52  
53  
54  
55  
56  
57  
58  
59  
60 births.

- 1  
2  
3 3) Perform species-specific qPCR assays on samples collected from fetal membranes and  
4 histological examination of membranes and umbilical cord to determine if vaginal bacteria  
5 ascend to the upper genital tract and cause inflammation in the fetal membranes and  
6  
7 umbilical cord.  
8  
9  
10

## 11 **METHODS AND ANALYSIS**

### 12 **STUDY DESIGN, SETTING, AND TIMELINE**

13  
14  
15 The MPTB Study is a prospective case-cohort study. Eligible women enroll prior to conception  
16 and are followed through preconception, pregnancy, delivery, and early postpartum. Participants  
17 will be selected into the case-cohort sample as detailed in the Statistical Analysis section. Study  
18 sites are located at Kenyatta National Hospital (KNH) in Nairobi and at Ganjoni Health Center and  
19 Coast Provincial General Hospital (CPGH) in Mombasa.  
20  
21  
22  
23  
24  
25  
26  
27  
28

29 Enrollment began in Nairobi in April 2017 and Mombasa in April 2018. Preconception enrollment  
30 of participants will continue through approximately June 2019 with the last study deliveries  
31 occurring in 2021, approximately 18 months after the last enrollment.  
32  
33  
34  
35

### 36 **ELIGIBILITY CRITERIA AND RECRUITMENT**

37  
38 The target population is HIV-negative women who are currently planning to become pregnant.  
39 Additional eligibility criteria include being  $\leq 45$  years old, having a menstrual period in the prior  
40 three months or recently discontinued contraceptive methods that induce amenorrhea (e.g.,  
41 implant, hormonal intrauterine device), willing to comply with study procedures, and able to  
42 provide informed consent. Minors aged 14-17 are eligible if emancipated under Kenyan law.  
43 Exclusion criteria include current pregnancy, continuing contraception other than condoms for  
44 HIV/STI prevention, having a depo medroxyprogesterone acetate injection in the last three  
45 months, history of cervical or uterine surgery (other than cesarean section), known autoimmune  
46 disease, antibiotic use in the prior four weeks, and history of infertility care-seeking. For women  
47  
48  
49  
50  
51  
52  
53  
54  
55  
56  
57  
58  
59  
60

1  
2  
3 with known HIV-positive male partners, their partner must have an undetectable HIV viral load, or  
4 the participant must be taking pre-exposure prophylaxis.  
5  
6  
7

8  
9 Participants are recruited by study staff or referred by healthcare providers at sites providing  
10 reproductive or maternal health services. Women discontinuing contraception for the purpose of  
11 becoming pregnant are a key recruitment population.  
12  
13  
14

## 15 16 17 18 STUDY VISITS AND PROCEDURES

19 Study participation occurs in six phases including screening/enrollment, periodontal examination,  
20 preconception, pregnancy, delivery, and postpartum (Figure 1). Specimen collection, laboratory  
21 testing, and other clinical procedures are summarized in Table 1.  
22  
23  
24  
25

### 26 27 28 **Screening and Enrollment**

29 Following written informed consent for screening, study staff perform urine pregnancy testing and  
30 rapid HIV testing according to Kenyan guidelines [29], and conduct an eligibility interview. Eligible  
31 women can enroll immediately upon consent. If enrollment occurs at a later date, pregnancy  
32 testing is repeated to re-confirm eligibility.  
33  
34  
35  
36  
37  
38  
39

40  
41 Enrollees complete a structured face-to-face interview regarding demographics, sexual behavior,  
42 substance use, depression symptoms (Patient Health Questionnaire-9), and reproductive and  
43 medical history. A study clinician performs a physical examination and speculum-assisted pelvic  
44 examination. If a woman is menstruating, the examination is deferred to avoid sampling during  
45 this interval when the vaginal microbiota undergoes rapid changes [30,31]. Two vaginal fluid  
46 specimens are collected by rolling push-off Dacron swabs (FitzCo, Inc) three rotations against the  
47 lateral vaginal wall; these are stored for vaginal microbiota and inflammatory response evaluation.  
48  
49 Additional genital specimens are collected for STI diagnosis [*Neisseria gonorrhoeae*, *Chlamydia*  
50  
51  
52  
53  
54  
55  
56  
57  
58  
59  
60

1  
2  
3 *trachomatis*, and *Trichomonas vaginalis* by nucleic acid amplification testing (NAAT)], vaginal and  
4 cervical Gram stains, detection of prostate specific antigen (PSA) and elevated sialidase using a  
5 point-of-care diagnostic test for BV (Diagnosit BVBLUE, Gryphus Diagnostics). A vaginal  
6 specimen is inoculated onto Rogosa agar for detection of *Lactobacillus*. Syndromic management  
7 is provided as indicated for genital syndromes including vaginal discharge [32]. Additional therapy  
8 is provided at the first preconception visit based on STI NAAT results.  
9  
10  
11  
12  
13  
14  
15  
16  
17

18 After the examination, women receive counseling on healthy behaviors during preconception and  
19 pregnancy including smoking cessation, refraining from vaginal washing, and a healthy diet. Study  
20 clinicians discuss participants' menstrual cycle and identify the probable fertile window using  
21 calendar-based methods. Ovulation is estimated to occur 14 days prior to the first day of the next  
22 predicted menses, with the most fertile days emphasized as the five days before and day of  
23 ovulation [33]. All participants receive prenatal vitamins.  
24  
25  
26  
27  
28  
29  
30  
31  
32

### 33 **Periodontal Exam**

34 Periodontitis has been associated with SPTB [6] so participants undergo a periodontal  
35 examination. Since pregnancy increases gingival inflammation [34], examinations occur within  
36 four weeks of enrollment. The oral examination includes assessment for periodontitis using  
37 periodontal pocket depth and clinical attachment measurements, and the Decay-Missing-Filled  
38 Index and Gingival Index assessments [35]. Presence and severity of periodontitis are defined  
39 using the 2007 Centers for Disease Control and Prevention/American Academy of Periodontology  
40 case definitions [36]. Participants also complete a modified version of the WHO's oral health  
41 questionnaire [35].  
42  
43  
44  
45  
46  
47  
48  
49  
50  
51  
52  
53  
54  
55  
56  
57  
58  
59  
60

### Monthly Preconception Visits

Participants return for study visits at one-month intervals while trying to become pregnant. Retention staff call participants in advance of each appointment. A structured interview is conducted to update sexual behavior and medical history. Women self-collect vaginal swabs for microbiota and inflammatory response analysis, vaginal Gram stain, PSA detection, *Lactobacillus* culture, and sialidase detection. Participants with genital symptoms receive syndromic management [32].

A urine pregnancy test is performed, and participants with a positive test are scheduled for a first trimester visit between 9-12 weeks of gestation. Most women who remain non-pregnant after six months exit the study; those who discontinued DMPA less than six months prior to enrollment are eligible for nine months of preconception 'trying time' due to delayed return to fertility after DMPA discontinuation [37,38].

### First Trimester Visit (9-12 weeks of gestation)

At the first trimester visit, a structured interview is conducted to update information on sexual behavior and medical history. Women self-collect vaginal swabs for microbiota and inflammatory response analysis, vaginal Gram stain, PSA detection, and *Lactobacillus* culture. Women then undergo an obstetrical ultrasound to confirm gestational age. The ultrasound is conducted by sonographers at KNH in Nairobi and at a private radiology facility in Mombasa (training and quality control described in Table 2). The American College of Obstetrics & Gynecology's 2014 guidelines are used to estimate gestational age if the ultrasound derived estimate differs from that calculated using the last menstrual period by >7 days before 16 weeks [39]. If a later ultrasound is obtained, the sonographic dates are used if they differ from last menstrual period dates by >10 days between 16 and 22 weeks, >14 days between 22 and 28 weeks, and >21 days after 28 weeks.



1  
2  
3 Pregnant participants are referred to routine antenatal care (ANC) and enrolled into a short  
4 message service (SMS) program to support retention (see Retention During Pregnancy section).  
5  
6 Routinely collected antenatal data (e.g., syphilis test results, blood pressure) are abstracted from  
7  
8 participants' ANC facility records and the Mother and Child Health Booklet provided to all pregnant  
9  
10 Kenyan women.  
11  
12

13  
14  
15 If a participant suffers a miscarriage, management of the pregnancy loss is conducted by non-  
16  
17 study clinicians according to standard of care. Women who miscarry at <20 weeks of gestation  
18  
19 may remain in the study for six additional monthly preconception visits if they would like to try for  
20  
21 another pregnancy.  
22  
23

### 24 25 26 **Retention During Pregnancy**

27  
28 To improve retention, participants are offered enrollment into an adaptation of a two-way SMS  
29  
30 program that was initially designed to support HIV-positive Kenyan women during pregnancy and  
31  
32 postpartum [40]. Messages are sent at 16, 20, and 24 weeks gestation, bi-weekly beginning at 28  
33  
34 weeks, and weekly from 38 weeks through six weeks postpartum. In addition, study nurses call  
35  
36 participants weekly starting at week 35 to confirm pregnancy status and planned delivery location.  
37  
38 Participants are instructed to call at the onset of labor so study staff can coordinate collection of  
39  
40 delivery samples for deliveries at KNH or CPGH, and to assist with identification of the delivery  
41  
42 date for births occurring elsewhere.  
43  
44

### 45 46 47 **Delivery Procedures**

48  
49 Deliveries follow standard obstetrical procedures and are not conducted by study staff. Swabs  
50  
51 from between the fetal membranes and placental samples are collected for births occurring at  
52  
53 KNH and CPGH by trained labor and delivery nurses (training and quality control described in  
54  
55 Table 2). Upon vaginal or caesarean delivery of the placenta, it is placed in a sterile container.  
56  
57

1  
2  
3 Samples are collected as soon as feasible and within two hours of delivery. Using sterile  
4 technique, a pair of nurses collects samples from between the amnion and chorion [41]. A sterile  
5 push-off swab (FitzCo, Inc) is collected from between the membranes, placed in a cryovial, and  
6 temporarily stored in a -4°C (Nairobi) or -20°C (Mombasa) freezer. The placenta is placed in 10%  
7 neutral-buffered formalin. Laboratory staff transport the fetal membrane swab to a -80°C freezer  
8 in study laboratories at KNH and CPGH within one working day. Laboratory staff also collect  
9 placental samples for histopathology. These include a four-centimeter fetal membrane roll from  
10 the ruptured edge of the membranes to the edge of the placental disc, a one-centimeter section  
11 of umbilical cord starting three centimeters from the placental disk, and a one-centimeter block of  
12 placenta with overlying membranes adjacent to the site of cord insertion. All pathological  
13 specimens are stored in 10% neutral-buffered formalin.  
14  
15  
16  
17  
18  
19  
20  
21  
22  
23  
24  
25  
26  
27  
28

29 Study staff abstract data from delivery records, including type of delivery (i.e., vaginal or  
30 caesarean; labored or did not labor; spontaneous or induced labor), complications, live birth or  
31 stillbirth, and birthweight.  
32  
33  
34  
35  
36

### 37 **Postpartum Visit**

38  
39 At the six-week postpartum visit, clinicians abstract any ANC and delivery details not previously  
40 captured from the participant's delivery discharge report and Mother & Child Health Booklet.  
41  
42 Participants complete an interview about the infant's health and immunization status.  
43  
44  
45  
46  
47

### 48 **Incentives**

49  
50 Participants receive KSh 300 (about \$3.00) at each study visit. This amount is consistent with  
51 other studies in Kenya and is provided to cover transportation costs. Women who become  
52  
53  
54  
55  
56  
57  
58  
59  
60

1  
2  
3 pregnant receive a free obstetrical ultrasound. An incentive of 1000 KSH is provided for  
4 deliveries at KNH or CPGH.  
5  
6  
7  
8

## 9 LABORATORY METHODS

### 11 **Microscopy, *Lactobacillus* culture, STI testing, and detection of sialidase and PSA in** 12 **vaginal fluids**

13  
14  
15 Vaginal Gram stained slides are evaluated for BV using the criteria developed by Nugent and  
16 Hillier [42]. Saline and potassium hydroxide wet mounts are examined for the presence of motile  
17 trichomonads, clue cells, yeast, and sperm. Endocervical Gram stained slides are scanned at low  
18 power, and polymorphonuclear leukocytes in three nonadjacent oil immersion fields are counted  
19 and averaged to evaluate cervical inflammation. Clinicians inoculate vaginal specimens directly  
20 on Rogosa agar for detection of cultivable *Lactobacillus* and store the plate in a candle jar until  
21 transportation to the laboratory within four hours [43]. Hydrogen peroxide production is evaluated  
22 by subculture of *Lactobacillus* isolates on tetramethylbenzidine agar containing horseradish  
23 peroxidase [44]. A vaginal specimen is tested for *N. gonorrhoeae*, *C. trachomatis*, and *T. vaginalis*  
24 by NAAT (Aptima Combo-2 CT/NG Detection System, Aptima *Trichomonas vaginalis* assay;  
25 Hologic Corporation). One vaginal swab is used for detection of sialidase using a commercially  
26 available BV diagnostic test (Diagnosit BVBLUE; Gryphus Diagnostics). Testing for PSA in  
27 vaginal samples is performed with a commercially available assay (ABAcad, Abacus  
28 Diagnostics), which can detect semen for 24-48 hours after condomless sex [45].  
29  
30  
31  
32  
33  
34  
35  
36  
37  
38  
39  
40  
41  
42  
43  
44  
45  
46

### 47 **Molecular methods for identification of bacteria in vaginal and fetal membrane samples**

48  
49 Stored vaginal and fetal membrane swabs for bacterial PCR will be transported on dry ice to the  
50 Fredricks Laboratory at the Fred Hutchinson Cancer Research Center in Seattle, WA. Qiagen  
51 QIAamp BiOstic Bacteremia DNA Isolation Kits (Qiagen, Germantown, MD) will be used to extract  
52 DNA from vaginal swabs. This protocol uses bead beating and chaotropic lysis to break apart  
53  
54  
55  
56  
57  
58  
59  
60

1  
2  
3 bacterial cells and recover DNA that is free of PCR inhibitors. Swabs that have not contacted a  
4 human surface will be processed in parallel to serve as sham DNA extraction (negative) controls.  
5  
6 Extracted DNA will be subjected to broad-range 16S rRNA gene PCR using primers that anneal  
7  
8 with highly conserved regions of the small subunit rDNA gene, amplifying a 470 base pair segment  
9  
10 that contains a highly variable sequence useful for species identification. Bar coded primers will  
11  
12 be used to multiplex samples [46]. Libraries of 16S rDNA gene amplicons will be mixed for  
13  
14 sequencing on the Illumina MiSeq platform using 300 bp paired-end reads. The assembled reads  
15  
16 will be binned into individual study samples using the nucleic acid bar codes. Approximately  
17  
18 10,000-30,000 sequence reads will be generated per sample, providing robust detection of  
19  
20 minority species. Raw sequence reads will be demultiplexed using Illumina's on-board bclfastq  
21  
22 conversion software v1.8.4 with zero mismatches in either forward or reverse indices. The DADA2  
23  
24 software package will be used to quality control, filter, pair and cluster the amplicon sequence  
25  
26 reads [47]. Sequence variants will be assigned taxonomy using the phylogenetic placement tool  
27  
28 *ppIacer* [48] and a custom vaginal reference set [11]. Sham extraction controls will also be  
29  
30 processed in parallel to exclude bacterial contamination of reagents. Bacterium-specific qPCR  
31  
32 assays will also be performed. This study focuses on species hypothesized to be associated with  
33  
34 increased risk of SPTB, such as BVAB1, *Megasphaera*, and *Sneathia*. The final set of  
35  
36 species/genera tested will be fine-tuned following analysis of the deep sequencing data from Aim  
37  
38 1, selecting additional bacteria based on a comparison of the relative abundance of individual  
39  
40 taxa in women with and without SPTB. A standard exogenous jellyfish qPCR amplification control  
41  
42 will be used to assess for PCR inhibitors [49]. A broad-range bacterial 16S rDNA gene qPCR  
43  
44 assay will be used to measure total bacterial load in each sample.  
45  
46  
47  
48  
49  
50

### 51 **Histopathological examination of fetal membranes, placenta, and umbilical cord samples**

52 Hematoxylin and eosin staining of fetal membrane rolls, placental samples, and umbilical cord  
53  
54 sections will be graded according to published guidelines by an experienced pathologist (Dr.  
55  
56  
57  
58  
59

1  
2  
3 Mandaliya) [50]. Acute and subacute inflammatory lesions will be graded and staged for both  
4 maternal and fetal components. Chronic inflammatory lesions will be characterized including any  
5 observation of chronic deciduitis or the presence of decidual plasma cells.  
6  
7  
8  
9

## 10 STATISTICAL ANALYSIS

### 11 **Sample size estimate and case-cohort population generating**

12  
13  
14 Aim 2 requires the largest sample size and was used to guide sample size estimation for this case  
15 cohort study [51]. The prospective case-cohort analysis set will include three women who  
16 delivered at term for each one with SPTB. Assuming three primary species/genera of interest,  
17 Simes' methodology was utilized to fix a type-1 error rate adjusted for three tests [52]. A sample  
18 of 80 SPTB and 240 term births has  $\geq 80\%$  power to detect a statistically significant  $\geq 2.8$ -fold  
19 difference in the odds of detecting a preconception vaginal bacterial species/genus in women with  
20 SPTB versus term delivery, assuming  $\geq 10\%$  prevalence of the organism at preconception visits  
21 for term deliveries.  
22  
23  
24  
25  
26  
27  
28  
29  
30  
31

32  
33  
34 To accrue 80 SPTB cases including women with spontaneous preterm labor or preterm premature  
35 rupture of membranes, a cohort of approximately 1100 women will be enrolled. Once 80 SPTB  
36 cases occur, the sample for the case-cohort will be defined. First, cases of spontaneous abortion  
37 (<20 weeks gestation) and preterm births without spontaneous labor or preterm premature rupture  
38 of membranes will be excluded. Next, a random sample of the remaining pregnancies will be  
39 selected such that when added to the remaining SPTB cases, the case-cohort sample will have  
40 a term birth to SPTB ratio of 3:1. A sampling fraction  $f$ , with  $f$  solved using the formula:  $nf + (1-f)*80=320$ , where  $n$  is the total number of women (cases and non-cases) with delivery data, will  
41 be used to select the random sample. Lastly, all of the remaining SPTB cases will be added to  
42 the random sample, creating the full case-cohort sample.  
43  
44  
45  
46  
47  
48  
49  
50  
51  
52  
53  
54  
55  
56  
57  
58  
59  
60

### Statistical analysis plan

The goal of Aim 1 is to characterize and compare preconception vaginal species diversity and richness between women with SPTB versus term birth. All women with SPTB and a random sample of the same number of women with term birth from the case-cohort sample will be included. To describe the overall frequency and relative abundance of species, cumulative rank abundance plots will be generated for each group [53]. We will compare the cumulative distribution of preconception vaginal bacterial taxa between women with SPTB versus term birth using the Kolmogorov-Smirnov test. Rarefaction curves will be used to evaluate species richness (number of taxa at a 97% sequence similarity cutoff defining an operational taxonomic unit) in women with SPTB versus term birth. Finally, we will assess species diversity (Shannon Diversity Index [54]) and species richness (Chao1 richness estimator [55]) by comparing the mean values between women with SPTB versus term birth. We will perform logistic regression with SPTB status as the outcome and species rank abundance percentage for each species. We will first determine the score statistics (SPTB status as the outcome) for each variable, then rank the variables from largest to smallest score statistic. Next, we will perform the logistic modeling on each of these in rank order of score statistic until reaching a p-value of 0.2 in univariate logistic regressions. These data will be examined to refine targets for the primary hypothesis test in Aim 2.

For Aim 2, based on the literature and informed by Aim 1 results, bacterial species/genera will be selected for evaluation using qPCR assays, comparing their presence and concentrations in vaginal specimens sampled before conception. These analyses will utilize data from the full case-cohort sample and will be weighted to account for the sampling scheme. For each bacterial taxon, we will perform unadjusted logistic regression to examine the association between the presence of that taxon and the risk of SPTB. Multivariable logistic regression analysis will be used to determine the independent contributions of bacterial species to the risk of SPTB. Species

1  
2  
3 associated with SPTB in univariate analyses ( $p < 0.10$ ) will be included in the multivariable model  
4 after addressing collinearity. A manual forward stepwise model building approach will be used to  
5 address confounding. Potential confounding factors are listed in Table 3. For the three species  
6 selected for the primary hypothesis test,  $p < 0.033$  will be considered statistically significant, using  
7 the Simes' correction for multiple comparisons. Other bacterial taxa may be evaluated as  
8 exploratory analyses. Additional exploratory analyses will be performed to investigate the  
9 relationship between preconception quantities of specific bacteria and risk of SPTB.  
10  
11  
12  
13  
14  
15  
16  
17  
18  
19

20 Aim 3 explores the association between bacteria detected in vaginal preconception samples and  
21 fetal membrane samples to further support the role of ascending vaginal bacteria in SPTB. This  
22 analysis will also evaluate the association between bacteria identified in the fetal membranes and  
23 histological evidence of deciduitis, chorioamnionitis, and funisitis. The analysis will use data from  
24 women in the case-cohort sample with delivery samples. The exposures are preconception  
25 detection of each of the three vaginal species tested for the primary hypothesis in Aim 2.  
26 Outcomes includes detection of the same bacterial species in fetal membranes, deciduitis,  
27 chorioamnionitis, and funisitis. Odds ratios will be estimated for each exposure using unadjusted  
28 logistic regression models, and multivariable logistic regression analyses will be utilized to adjust  
29 for potential confounding factors (Table 3).  
30  
31  
32  
33  
34  
35  
36  
37  
38  
39  
40  
41  
42  
43

#### 44 PATIENT AND PUBLIC INVOLVEMENT

45  
46 Neither patients nor the public were involved in the design of this research. Healthcare providers  
47 providing reproductive/maternal health services and study participants can refer potentially  
48 eligible women to the study.  
49  
50  
51  
52  
53  
54  
55  
56  
57  
58  
59  
60

## ETHICS AND DISSEMINATION

This study was approved by the ethics committees at KNH and University of Washington. There are inherent risks to women and fetuses during pregnancy and delivery, but participation in this observational study does not increase these risks. Study participation risks include discomfort associated with the fingerstick for HIV testing, sensitive questions about sexual behavior, and the pelvic examination; stress associated with HIV or STI diagnosis; and breach of confidentiality. To minimize these risks, experienced Kenyan research staff fluent in both English and Kiswahili conduct a robust consent process. At screening, the screening procedures are explained and written informed consent is obtained with forms available in English and Kiswahili. Eligible women who opt to participate in the study undergo a separate consenting process for study enrollment, including verbal explanation of the procedures and written informed consent. Participants are counselled on potential risks and are informed that they can withdraw from the study at any time. The risk of breach of confidentiality is minimized by following Good Clinical Practice procedures for data security. Signed consents are secured in locked cabinets in a restricted area. Study identification numbers are assigned to de-identify hard copies of the case report forms, which are locked in a restricted area. Data are entered into a password-protected database using encrypted computers. Results will be disseminated to clinicians at study sites and partner institutions, presented at conferences, and published in peer-reviewed journals.

## DISCUSSION

Most cases of SPTB occur without a known cause [3]. Bacterial vaginosis during pregnancy is associated with increased risk of SPTB, but clinical trials of BV treatment in pregnancy have shown minimal or no reduction in SPTB [9]. The MPTB Study addresses the hypothesis that the vaginal microbiota detected during the preconception period may be linked to SPTB. The findings could shift the paradigm for thinking about the mechanisms linking vaginal microbiota and preterm birth, and could be used to guide the development and evaluation of interventions aimed at



1  
2  
3 lowering the risk of SPTB by identifying and eradicating high-risk vaginal bacteria prior to  
4  
5 conception [56–58].  
6  
7  
8  
9  
10  
11  
12  
13  
14  
15  
16  
17  
18  
19  
20  
21  
22  
23  
24  
25  
26  
27  
28  
29  
30  
31  
32  
33  
34  
35  
36  
37  
38  
39  
40  
41  
42  
43  
44  
45  
46  
47  
48  
49  
50  
51  
52  
53  
54  
55  
56  
57  
58  
59  
60

## REFERENCES

- 1 Beck S, Wojdyla D, Say L, *et al.* The worldwide incidence of preterm birth: a systematic review of maternal mortality and morbidity. *Bull World Health Organ* 2010;**88**:31–8. doi:10.2471/BLT.08.062554
- 2 Liu L, Oza S, Hogan D, *et al.* Global, regional, and national causes of under-5 mortality in 2000–15: an updated systematic analysis with implications for the Sustainable Development Goals. *Lancet* 2016;**388**:3027–35. doi:10.1016/S0140-6736(16)31593-8
- 3 Goldenberg RL, Culhane JF, Iams JD, *et al.* Epidemiology and causes of preterm birth. *Lancet* 2008;**371**:75–84. doi:10.1016/S0140-6736(08)60074-4
- 4 Goldenberg RL, Culhane JF, Johnson DC. Maternal infection and adverse fetal and neonatal outcomes. *Clin Perinatol* 2005;**32**:523–59. doi:10.1016/j.clp.2005.04.006
- 5 Hendler I, Goldenberg RL, Mercer BM, *et al.* The Preterm Prediction study: Association between maternal body mass index and spontaneous and indicated preterm birth. *Am J Obstet Gynecol* 2005;**192**:882–6. doi:10.1016/j.ajog.2004.09.021
- 6 Daalderop LA, Wieland B V., Tomsin K, *et al.* Periodontal disease and pregnancy outcomes: Overview of systematic reviews. *JDR Clin Transl Res* 2018;**3**:10–27. doi:10.1177/2380084417731097
- 7 Hillier S, Mrazek J, Holmes KK. Bacterial Vaginosis. In: Holmes KK, Sparling P, Stamm W, *et al.*, eds. *Sexually Transmitted Infections*. New York, NY: : McGraw Hill Companies 2007. 737–68.
- 8 Leitich H, Kiss H. Asymptomatic bacterial vaginosis and intermediate flora as risk factors for adverse pregnancy outcome. *Best Pract Res Clin Obstet Gynaecol* 2007;**21**:375–90. doi:10.1016/j.bpobgyn.2006.12.005
- 9 Brocklehurst P, Gordon A, Heatley E, *et al.* Antibiotics for treating bacterial vaginosis in pregnancy. *Cochrane Collab* 2013;**1**–123. doi:10.1002/14651858.CD000262.pub4.
- 10 Ravel J, Gajer P, Abdo Z, *et al.* Vaginal microbiome of reproductive-age women. *Proc*

- 1  
2  
3 *Natl Acad Sci* 2011;**108**:4680–7. doi:10.1073/pnas.1002611107  
4  
5 11 Srinivasan S, Hoffman NG, Morgan MT, *et al*. Bacterial communities in women with  
6 bacterial vaginosis: High resolution phylogenetic analyses reveal relationships of  
7 microbiota to clinical criteria. *PLoS One* 2012;**7**:e37818.  
8  
9 doi:10.1371/journal.pone.0037818  
10  
11  
12 12 Hyman RW, Fukushima M, Jiang H, *et al*. Diversity of the vaginal microbiome correlates  
13 with preterm birth. *Reprod Sci* 2014;**21**:32–40. doi:10.1177/1933719113488838  
14  
15  
16 13 Stout MJ, Zhou Y, Wylie KM, *et al*. Early pregnancy vaginal microbiome trends and  
17 preterm birth. *Am J Obstet Gynecol* 2017;**217**:356.e1-356.e18.  
18  
19 doi:10.1016/j.ajog.2017.05.030  
20  
21  
22 14 Freitas AC, Bocking A, Hill JE, *et al*. Increased richness and diversity of the vaginal  
23 microbiota and spontaneous preterm birth. *Microbiome* 2018;**6**:117. doi:10.1186/s40168-  
24  
25  
26  
27  
28  
29  
30  
31 15 Brown RG, Al-Memar M, Marchesi JR, *et al*. Establishment of vaginal microbiota  
32 composition in early pregnancy and its association with subsequent preterm prelabor  
33 rupture of the fetal membranes. *Transl Res* 2019;**207**:30–43.  
34  
35  
36  
37  
38  
39 16 Fettweis JM, Serrano MG, Brooks JP, *et al*. The vaginal microbiome and preterm birth.  
40  
41  
42  
43  
44 17 Romero R, Hassan SS, Gajer P, *et al*. The vaginal microbiota of pregnant women who  
45 subsequently have spontaneous preterm labor and delivery and those with a normal  
46 delivery at term. *Microbiome* 2014;**2**:18. doi:10.1186/2049-2618-2-18  
47  
48  
49 18 Nelson DB, Shin H, Wu J, *et al*. The gestational vaginal microbiome and spontaneous  
50 preterm birth among nulliparous African American women. *Am J Perinatol* 2016;**33**:887–  
51  
52  
53  
54  
55 93. doi:10.1055/s-0036-1581057  
56  
57 19 Elovitz MA, Gajer P, Riis V, *et al*. Cervicovaginal microbiota and local immune response  
58  
59  
60

- 1  
2  
3 modulate the risk of spontaneous preterm delivery. *Nat Commun* 2019;**10**:1305.  
4  
5 doi:10.1038/s41467-019-09285-9  
6  
7 20 DiGiulio DB, Callahan BJ, McMurdie PJ, *et al*. Temporal and spatial variation of the  
8 human microbiota during pregnancy. *Proc Natl Acad Sci* 2015;**112**:11060–5.  
9  
10 doi:10.1073/pnas.1502875112  
11  
12  
13 21 Callahan BJ, DiGiulio DB, Goltsman DSA, *et al*. Replication and refinement of a vaginal  
14 microbial signature of preterm birth in two racially distinct cohorts of US women. *Proc Natl*  
15 *Acad Sci* 2017;**114**:9966–9971. doi:10.1073/pnas.1705899114  
16  
17  
18 22 Stafford GP, Parker JL, Amabebe E, *et al*. Spontaneous preterm birth is associated with  
19 differential expression of vaginal metabolites by lactobacilli-dominated microflora. *Front*  
20 *Physiol* 2017;**8**:615. doi:10.3389/fphys.2017.00615  
21  
22  
23 23 Nelson DB, Hanlon A, Nachamkin I, *et al*. Early pregnancy changes in bacterial  
24 vaginosis-associated bacteria and preterm delivery. *Paediatr Perinat Epidemiol*  
25 2014;**28**:88–96. doi:10.1111/ppe.12106  
26  
27  
28 24 Menard JP, Mazouni C, Salem-Cherif I, *et al*. High vaginal concentrations of *Atopobium*  
29 *vaginae* and *Gardnerella vaginalis* in women undergoing preterm labor. *Obstet Gynecol*  
30 2010;**115**:134–40. doi:10.1097/AOG.0b013e3181c391d7  
31  
32  
33 25 Nelson DB, Hanlon A, Hassan S, *et al*. Preterm labor and bacterial vaginosis-associated  
34 bacteria among urban women. *J Perinat Med* 2009;**37**:130–4. doi:10.1515/JPM.2009.026  
35  
36  
37 26 Rahkonen L, Rutanen EM, Unkila-Kallio L, *et al*. Factors affecting matrix  
38 metalloproteinase-8 levels in the vaginal and cervical fluids in the first and second  
39 trimester of pregnancy. *Hum Reprod* 2009;**24**:2693–702. doi:10.1093/humrep/dep284  
40  
41  
42 27 de Andrade Ramos B, Kanninen TT, Sisti G, *et al*. Microorganisms in the female genital  
43 tract during pregnancy: Tolerance versus pathogenesis. *Am J Reprod Immunol*  
44 2015;**73**:383–9. doi:10.1111/aji.12326  
45  
46  
47 28 Prince AL, Antony KM, Chu DM, *et al*. The microbiome, parturition, and timing of birth:  
48  
49  
50  
51  
52  
53  
54  
55  
56  
57  
58  
59  
60

- 1  
2  
3 More questions than answers. *J Reprod Immunol* 2014;**104–105**:12–9.  
4  
5 doi:10.1016/j.jri.2014.03.006  
6  
7 29 National AIDS & STD Control Programme. Guidelines on Use of Antiretroviral Drugs for  
8  
9 Treating and Preventing HIV in Kenya. Nairobi, Kenya: 2018.  
10  
11 30 Gajer P, Brotman RM, Bai G, *et al*. Temporal dynamics of the human vaginal microbiota.  
12  
13 *Sci Transl Med* 2012;**4**:132ra52. doi:10.1126/scitranslmed.3003605  
14  
15 31 Srinivasan S, Liu C, Mitchell CM, *et al*. Temporal variability of human vaginal bacteria and  
16  
17 relationship with bacterial vaginosis. *PLoS One* 2010;**5**:e10197.  
18  
19 doi:10.1371/journal.pone.0010197  
20  
21 32 National AIDS & STI Control Programme of Kenya. Kenya National Guidelines for  
22  
23 Prevention, Management and Control of Sexually Transmitted Infections. Nairobi, Kenya:  
24  
25 2018.  
26  
27 33 Lynch CD, Jackson LW, Buck Louis GM. Estimation of the day-specific probabilities of  
28  
29 conception: current state of the knowledge and the relevance for epidemiological  
30  
31 research. *Paediatr Perinat Epidemiol* 2006;**20**:3–12. doi:10.1111/j.1365-3016.2006.00765  
32  
33  
34 Laine MA. Effect of pregnancy on periodontal and dental health. *Acta Odontol Scand*  
35  
36 2002;**60**:257–64. doi:10.1080/00016350260248210  
37  
38 35 World Health Organization. Oral Health Surveys - Basic Methods: Fifth Edition. Geneva,  
39  
40 Switzerland: 2013.  
41  
42 36 Page RC, Eke PI. Case definitions for use in population-based surveillance of  
43  
44 periodontitis. *J Periodontol* 2007;**78**:1387–99. doi:10.1902/jop.2007.060264  
45  
46 37 Pardthaisong T, Gray R, McDaniel E. Return of fertility after discontinuation of dept  
47  
48 medroxyprogesterone acetate and intra-uterine devices in northern Thailand. *Lancet*  
49  
50 1980;**315**:509–12. doi:10.1016/s0140-6736(80)92765-8  
51  
52 38 Schwallie P, Assenzo J. The effect of depo-medroxyprogesterone acetate on pituitary  
53  
54 and ovarian function, and the return of fertility following its discontinuation: a review.  
55  
56  
57  
58  
59  
60

- 1  
2  
3 *Contraception* 1974;**10**:181–202. doi:10.1016/0010-7824(74)90073-0  
4  
5 39 Committee opinion no 611: Method for estimating due date. *Obs Gynecol* 2014;**124**:863–  
6  
7 6. doi:10.1097/01.AOG.0000454932.15177.be  
8  
9 40 Odeny TA, Newman M, Bukusi EA, *et al*. Developing content for a mHealth intervention  
10  
11 to promote postpartum retention in prevention of mother-to-child HIV transmission  
12  
13 programs and early infant diagnosis of HIV: A qualitative study. *PLoS One*  
14  
15 2014;**9**:e106383. doi:10.1371/journal.pone.0106383  
16  
17 41 Lannon SMR, Adams Waldorf KM, Fiedler T, *et al*. Parallel detection of lactobacillus and  
18  
19 bacterial vaginosis-associated bacterial DNA in the chorioamnion and vagina of pregnant  
20  
21 women at term. *J Matern Neonatal Med* 2019;**32**:2702–10.  
22  
23 doi:10.1080/14767058.2018.1446208  
24  
25 42 Nugent RP, Krohn MA, Hillier SL. Reliability of diagnosing bacterial vaginosis is improved  
26  
27 by a standardized method of Gram stain interpretation. *J Clin Microbiol* 1991;**29**:297–301.  
28  
29 43 Martin HL, Richardson BA, Nyange PM, *et al*. Vaginal lactobacilli, microbial flora, and risk  
30  
31 of human immunodeficiency virus type 1 and sexually transmitted disease acquisition. *J*  
32  
33 *Infect Dis* 1999;**180**:1863–8. doi:10.1086/315127  
34  
35 44 Eschenbach DA, Davick PR, Williams BL, *et al*. Prevalence of hydrogen peroxide-  
36  
37 producing lactobacillus species in normal women and women with bacterial vaginosis. *J*  
38  
39 *Clin Microbiol* 1989;**27**:251–6.  
40  
41 45 Hobbs M, Steiner M, Rich K, *et al*. Good performance of rapid prostate-specific antigen  
42  
43 test for detection of semen exposure in women: Implications for qualitative research. *Sex*  
44  
45 *Transm Dis* 2009;**36**:501–6. doi:10.1097/OLQ.0b013e3181a2b4bf  
46  
47 46 Golob JL, Pergam SA, Srinivasan S, *et al*. Stool Microbiota at Neutrophil Recovery Is  
48  
49 Predictive for Severe Acute Graft vs Host Disease after Hematopoietic Cell  
50  
51 Transplantation. *Clin Infect Dis* 2017;**65**:1984–91. doi:10.1093/cid/cix699  
52  
53 47 Callahan BJ, McMurdie PJ, Rosen MJ, *et al*. DADA2: High-resolution sample inference  
54  
55  
56  
57  
58  
59

- 1  
2  
3 from Illumina amplicon data. *Nat Methods* 2016;**13**:581–3. doi:10.1038/nmeth.3869  
4
- 5 48 Matsen F, Kodner R, Armbrust E. pplacer: linear time maximum-likelihood and Bayesian  
6 phylogenetic placement of sequences onto a fixed reference tree. *BMC Bioinformatics*  
7 2010;**11**:538. doi:10.1186/1471-2105-11-538  
8  
9
- 10 49 Khot PD, Ko DL, Hackman RC, *et al*. Development and optimization of quantitative PCR  
11 for the diagnosis of invasive aspergillosis with bronchoalveolar lavage fluid. *BMC Infect*  
12 *Dis* 2008;**8**:73. doi:10.1186/1471-2334-8-73  
13  
14
- 15 50 Kraus F, Redline R, Gersell D, *et al*. *Atlas of Nontumor Pathology - Placental Pathology*.  
16 Washington, DC: : American Registry of Pathology 2004.  
17  
18
- 19 51 Kim M, Xue X, Du Y. Approaches for calculating power for case-cohort studies.  
20 *Biometrics* 2006;**62**:929–33. doi:10.1111/j.1541-0420.2006.00639\_1.x  
21  
22
- 23 52 Simes R. An improved Bonferroni procedure for multiple tests of significance. *Biometrika*  
24 1986;**73**:751–4.  
25  
26
- 27 53 Hughes JB, Hellman JJ, Ricketts TH, *et al*. Counting the Uncountable: Statistical  
28 Approaches to Estimating Microbial Diversity. *Appl Environ Microbiol* 2001;**67**:4399–406.  
29 doi:10.1128/AEM.67.10.4399–4406.2001  
30  
31
- 32 54 Krebs C. *Ecological Methodology*. New York: : Harper Collins 1989.  
33  
34
- 35 55 Chao A. Non-parametric estimation of the number of classes in a population. *Scand J*  
36 *Stat* 1984;**11**:265–70.  
37  
38
- 39 56 McClelland RS, Balkus JE, Lee J, *et al*. Randomized trial of periodic presumptive  
40 treatment with high-dose intravaginal metronidazole and miconazole to prevent vaginal  
41 infections in HIV-negative women. *J Infect Dis* 2015;**211**:1875–82.  
42 doi:10.1093/infdis/jiu818  
43  
44
- 45 57 McClelland RS, Richardson BA, Hassan WM, *et al*. Improvement of vaginal health for  
46 Kenyan women at risk for acquisition of human immunodeficiency virus type 1: results of  
47 a randomized trial. *J Infect Dis* 2008;**197**:1361–8. doi:10.1086/587490  
48  
49  
50  
51  
52  
53  
54  
55  
56  
57  
58  
59  
60

- 1  
2  
3 58 Sobel JD, Ferris D, Schwebke J, *et al.* Suppressive antibacterial therapy with 0.75%  
4 metronidazole vaginal gel to prevent recurrent bacterial vaginosis. *Am J Obstet Gynecol*  
5 2006;**194**:1283–9. doi:10.1016/j.ajog.2005.11.041  
6  
7  
8  
9 59 Wanyonyi SZ, Napolitano R, Ohuma EO, *et al.* Image-scoring system for crown-rump  
10 length measurement. *Ultrasound Obstet Gynecol* 2014;**44**:649–54.  
11  
12  
13  
14 doi:10.1002/uog.13376  
15  
16  
17  
18  
19  
20  
21  
22  
23  
24  
25  
26  
27  
28  
29  
30  
31  
32  
33  
34  
35  
36  
37  
38  
39  
40  
41  
42  
43  
44  
45  
46  
47  
48  
49  
50  
51  
52  
53  
54  
55  
56  
57  
58  
59  
60



1  
2  
3 **AUTHORS' CONTRIBUTIONS:** RSM is the principal investigator. RSM and DF generated the  
4 idea for this study and supervised study protocol development and implementation. GJS  
5 contributed to essential elements of the protocol related to recruitment and retention of pregnant  
6 and postpartum women in Kenya. JK and WJ served as site principal investigators, overseeing  
7 study staff and implementation at Kenyatta National Hospital and Ganjoni Health Center. EML,  
8 SL, EF, KM, AK, and HA participated in designing the study, protocol, data collection tools, and  
9 staff training. BAR, RSM, DF, and SS developed the statistical analysis plan for the study. DF,  
10 SS, and KM oversaw laboratory methods. EML coordinates the study and wrote the first draft of  
11 the manuscript. All authors reviewed and approved the final manuscript.  
12  
13  
14  
15  
16  
17  
18  
19  
20  
21  
22  
23

24 **FUNDING STATEMENT:** This work was supported by a National Institutes of Health grant  
25 (NICHD R01 HD087346-RSM). RSM received additional support for mentoring (NICHD K24  
26 HD88229). EML was supported by a pre-doctoral fellowship (NIAID T32 AI07140-Lukehart). Data  
27 collection and management are made possible using REDCap electronic data capture tools  
28 hosted at the University of Washington's Institute of Translational Health Science supported by  
29 grants from NCATS/NIH (UL1 TR002319, KL2 TR002317, and TL1 TR002318).  
30  
31  
32  
33  
34  
35  
36  
37  
38

39 **COMPETING INTERESTS STATEMENT:** RSM has received honoraria for consulting from Lupin  
40 Pharmaceuticals and receives research funding, paid to the University of Washington, from  
41 Hologic Corporation.  
42  
43  
44  
45  
46

47 **ACKNOWLEDGEMENTS:** We would like to acknowledge the clinic, laboratory, and  
48 administrative study staff in Nairobi, Mombasa, and Seattle for their dedication and teamwork.  
49 We are also grateful to Kenyatta National Hospital, Coast Provincial General Hospital, and the  
50 Mombasa County Department of Health for supporting this research and providing clinical and  
51 laboratory space. We thank the study participants whose commitment has made the ongoing  
52  
53  
54  
55  
56  
57  
58  
59  
60

1  
2  
3 implementation of this protocol possible. Development and implementation of the ultrasound  
4  
5 quality assurance measures has been generously and skillfully supported by Dr. Robert Nathan  
6  
7 (University of Washington) and Dr. Christine Mamai (Kenyatta National Hospital). Lastly, the  
8  
9 authors thank Dr. Anne Pulei, Dr. Lydia Okutoyi, Raheli Mukhwana and Grace Wang'ombe  
10  
11 (Kenyatta National Hospital), Charity Muthoni and Josephine Mwangi (Coast Provincial General  
12  
13 Hospital), and the labor and delivery nurses at KNH and CPGH for their contributions to the  
14  
15 successful training, oversight, and implementation of delivery sample collection.  
16  
17  
18  
19  
20  
21  
22  
23  
24  
25  
26  
27  
28  
29  
30  
31  
32  
33  
34  
35  
36  
37  
38  
39  
40  
41  
42  
43  
44  
45  
46  
47  
48  
49  
50  
51  
52  
53  
54  
55  
56  
57  
58  
59  
60

1  
2  
3 **Figure Title & Caption:**  
4

5 **Figure 1. Microbiota and Preterm Birth Study Phases** – Additional participant pathways: 1)  
6 Participants who discontinued DMPA injectable contraception within 6 months of study enrollment  
7 are eligible for 9 months of preconception follow-up. 2) Participants who miscarry are eligible to  
8 re-enter preconception follow-up for a second pregnancy attempt.  
9

10  
11  
12  
13  
14  
15  
16  
17  
18  
19  
20  
21  
22  
23  
24  
25  
26  
27  
28  
29  
30  
31  
32  
33  
34  
35  
36  
37  
38  
39  
40  
41  
42  
43  
44  
45  
46  
47  
48  
49  
50  
51  
52  
53  
54  
55  
56  
57  
58  
59  
60

For peer review only

**Table 1. Specimen collection, laboratory testing, and other procedures by study visit**

| Procedure Type                                                        | Screening | Enrollment | Periodontal Exam | Pre-conception | 9-12 Week Gestation | Delivery <sup>i</sup> | Postpartum |
|-----------------------------------------------------------------------|-----------|------------|------------------|----------------|---------------------|-----------------------|------------|
| <b>Specimen Collection</b>                                            |           |            |                  |                |                     |                       |            |
| Urine pregnancy test                                                  | X         | X          |                  | X              |                     |                       |            |
| Genital swabs                                                         |           |            |                  |                |                     |                       |            |
| APTIMA swab                                                           |           | X          |                  |                |                     |                       |            |
| Push-off swabs <sup>ii</sup>                                          |           | X          |                  | X              | X                   |                       |            |
| Cotton & Dacron swabs                                                 |           | X          |                  | X              | X                   |                       |            |
| Sialidase test swab                                                   |           | X          |                  | X              |                     |                       |            |
| Fetal membrane swab                                                   |           |            |                  |                |                     | X                     |            |
| Placental punch                                                       |           |            |                  |                |                     | X                     |            |
| Fetal membrane roll                                                   |           |            |                  |                |                     | X                     |            |
| Umbilical cord                                                        |           |            |                  |                |                     | X                     |            |
| <b>Laboratory Testing</b>                                             |           |            |                  |                |                     |                       |            |
| HIV Rapid Test                                                        | X         |            |                  |                |                     |                       |            |
| <i>N. gonorrhoeae</i> , <i>C. trachomatis</i> , & <i>T. vaginalis</i> |           | X          |                  |                |                     |                       |            |
| Cervical Gram stain                                                   |           | X          |                  |                |                     |                       |            |
| Vaginal pH                                                            |           | X          |                  |                |                     |                       |            |
| Vaginal wet mount                                                     |           | X          |                  |                |                     |                       |            |
| Vaginal Gram stain                                                    |           | X          |                  | X              | X                   |                       |            |
| <i>Lactobacillus</i> culture <sup>iii</sup>                           |           | X          |                  | X              | X                   |                       |            |
| Sialidase test                                                        |           | X          |                  | X              |                     |                       |            |
| PSA test                                                              |           | X          |                  | X              | X                   |                       |            |
| <b>Participant Questionnaires</b>                                     |           |            |                  |                |                     |                       |            |
| Eligibility screen                                                    | X         |            |                  |                |                     |                       |            |
| Demographics                                                          |           | X          |                  |                |                     |                       |            |
| Reproductive history                                                  |           | X          |                  |                |                     |                       |            |
| Medical history & current symptoms                                    |           | X          |                  | X              | X                   |                       |            |
| Sexual behavior                                                       |           | X          |                  | X              | X                   |                       |            |
| Substance use                                                         |           | X          |                  | X              | X                   |                       |            |
| Dental health history                                                 |           |            | X                |                |                     |                       |            |
| Neonatal health                                                       |           |            |                  |                |                     |                       | X          |
| <b>Obstetric Ultrasound</b>                                           |           |            |                  |                | X                   |                       |            |

1  
2  
3  
4 \_\_\_\_\_  
5 Abbreviations: PSA-prostate specific antigen

6 <sup>i</sup> Delivery follows standard obstetrical procedure and is not conducted by study staff

7 <sup>ii</sup> Storing for vaginal microbiota and vaginal inflammatory response testing

8 <sup>iii</sup> Rogosa agar, followed by sub-culture for hydrogen peroxide production on tetramethylbenzidine agar containing horseradish peroxidase  
9  
10  
11  
12  
13  
14  
15  
16  
17  
18  
19  
20  
21  
22  
23  
24  
25  
26  
27  
28  
29  
30  
31  
32  
33  
34  
35  
36  
37  
38  
39  
40  
41  
42  
43  
44  
45  
46  
47

For peer review only

1  
2  
3  
4  
5  
6  
7  
8  
9  
10  
11  
12  
13  
14  
15  
16  
17  
18  
19  
20  
21  
22  
23  
24  
25  
26  
27  
28  
29  
30  
31  
32  
33  
34  
35  
36  
37  
38  
39  
40  
41  
42  
43  
44  
45  
46  
47

**Table 2. Periodontal examination, first trimester obstetric ultrasound, and fetal membrane sample training and continuous quality control procedures**

| Procedure                                   | Initial Training                                                                                                                                                                                                                                                                                                                                 | Continuous Quality Control Procedures                                                                                                                                                                                                                                                                                                                                                                                                                                                                                                                                                                                                                                                                                                                                                                                       |
|---------------------------------------------|--------------------------------------------------------------------------------------------------------------------------------------------------------------------------------------------------------------------------------------------------------------------------------------------------------------------------------------------------|-----------------------------------------------------------------------------------------------------------------------------------------------------------------------------------------------------------------------------------------------------------------------------------------------------------------------------------------------------------------------------------------------------------------------------------------------------------------------------------------------------------------------------------------------------------------------------------------------------------------------------------------------------------------------------------------------------------------------------------------------------------------------------------------------------------------------------|
| <b>Periodontal examination</b>              | <ul style="list-style-type: none"> <li>The UoN periodontist conducted an in-person training with the CPGH dentist that included teaching, observation, and calibration.</li> </ul>                                                                                                                                                               | <ul style="list-style-type: none"> <li>Inter-examiner calibration bi-annually - The UoN periodontist and a second UoN experienced periodontist conduct periodontal exams on a series of patients to compare results. The UoN periodontist serves as the gold standard comparator for the CPGH dentist.</li> <li>Intra-examiner calibration once per 50 examinations – Examination is repeated on one participant to compare results between the first and second examination.</li> </ul>                                                                                                                                                                                                                                                                                                                                    |
| <b>First Trimester Obstetric Ultrasound</b> | <ul style="list-style-type: none"> <li>All sonographers received a standardized refresher training on ultrasound determination of gestational age, early pregnancy complications, and MPTB study specific procedures by the Kenyan study radiologist.</li> </ul>                                                                                 | <ul style="list-style-type: none"> <li>For each participant with a first trimester ultrasound, an image of the crown rump length is saved and quality is assessed by the study radiologist according to criteria developed for the International Fetal and Newborn Growth Consortium for the 21st Century [59]. (For participants with a crown rump length measurement of &gt;84mm, images are not saved and gestational age is assessed using biometric measurements.)</li> <li>Sonographers access the results of quality assessments for ongoing feedback.</li> <li>Annually, sonographers in Nairobi meet with the study radiologist to review quality metrics and receive refresher training on study procedures. The radiologist provides ongoing one-on-one support to the Mombasa sonographers by phone.</li> </ul> |
| <b>Fetal Membrane Sample</b>                | <ul style="list-style-type: none"> <li>Initial training of labor and delivery nurses and KNH based Kenyan obstetrician was performed by Dr. Lannon, who developed the fetal membrane collection technique [41].</li> <li>Trainees were required to demonstrate proficient sample collection technique and verbalize study procedures.</li> </ul> | <ul style="list-style-type: none"> <li>Subsequent trainings are conducted as needed and led by a Kenyan obstetrician-gynecologist based at KNH who participated in the initial training.</li> </ul>                                                                                                                                                                                                                                                                                                                                                                                                                                                                                                                                                                                                                         |

**Table 3. Potential key covariates in analysis of the association between preconception vaginal microbiota and spontaneous preterm birth**

| Variable                                                                                          | Timing                     | Method                                                                                                                       |
|---------------------------------------------------------------------------------------------------|----------------------------|------------------------------------------------------------------------------------------------------------------------------|
| <b>Demographics</b>                                                                               |                            |                                                                                                                              |
| Maternal Age                                                                                      | Baseline                   | FTFI                                                                                                                         |
| Educational level                                                                                 | Baseline                   | FTFI                                                                                                                         |
| Socioeconomic status                                                                              | Baseline                   | FTFI                                                                                                                         |
| Obstetrical history (e.g., number of pregnancies, time since last pregnancy, prior preterm birth) | Baseline                   | FTFI                                                                                                                         |
| Prior contraceptive history                                                                       | Baseline                   | FTFI                                                                                                                         |
| <b>Current pregnancy</b>                                                                          |                            |                                                                                                                              |
| Maternal hemoglobin level, blood pressure                                                         | Throughout pregnancy       | ANC records                                                                                                                  |
| Fetal health (e.g., Apgar scores, spontaneous breathing, birthweight, gender)                     | Delivery                   | Delivery records, FTFI or phone interview                                                                                    |
| Maternal infection                                                                                | Throughout pregnancy       | ANC and delivery records, FTFI or phone interview                                                                            |
| Maternal pregnancy complications                                                                  | Throughout pregnancy       | ANC and delivery records, FTFI or phone interview                                                                            |
| <b>General health status</b>                                                                      |                            |                                                                                                                              |
| Body mass index                                                                                   | Baseline                   | Measure weight & height                                                                                                      |
| Smoking                                                                                           | Baseline & follow-up       | FTFI                                                                                                                         |
| Alcohol use                                                                                       | Baseline & follow-up       | Alcohol use disorders identification test (AUDIT)                                                                            |
| Depressive symptoms                                                                               | Baseline                   | Patient health questionnaire-9 (PHQ-9)                                                                                       |
| Periodontitis                                                                                     | Within 4 weeks of baseline | Oral examination                                                                                                             |
| Genital tract infection/STI                                                                       | Baseline                   | Detection of gonorrhoea, chlamydia, and <i>T. vaginalis</i> by NAAT (Hologic).<br>Wet prep, vaginal and cervical Gram stain. |
| <i>Lactobacilli</i>                                                                               | Baseline & follow-up       | Culture on Rogosa and TMB agar                                                                                               |
| Unprotected sex                                                                                   | Baseline & follow-up       | FTFI                                                                                                                         |
| Prostate specific antigen                                                                         | Baseline & follow-up       | ABACard PSA Detection (Abacus Diagnostics)                                                                                   |
| Intravaginal practices                                                                            | Baseline & follow-up       | FTFI                                                                                                                         |

Abbreviations: ANC-antenatal clinic; FTFI-face-to-face interview; NAAT-nucleic acid amplification test; PHQ-9-patient health questionnaire version 9; PSA-prostate specific antigen; TMB-tetramethylbenzidine; STI-sexually transmitted infections

1  
2  
3  
4  
5  
6  
7  
8  
9  
10  
11  
12  
13  
14  
15  
16  
17  
18  
19  
20  
21  
22  
23  
24  
25  
26  
27  
28  
29  
30  
31  
32  
33  
34  
35  
36  
37  
38  
39  
40  
41  
42  
43  
44  
45  
46  
47

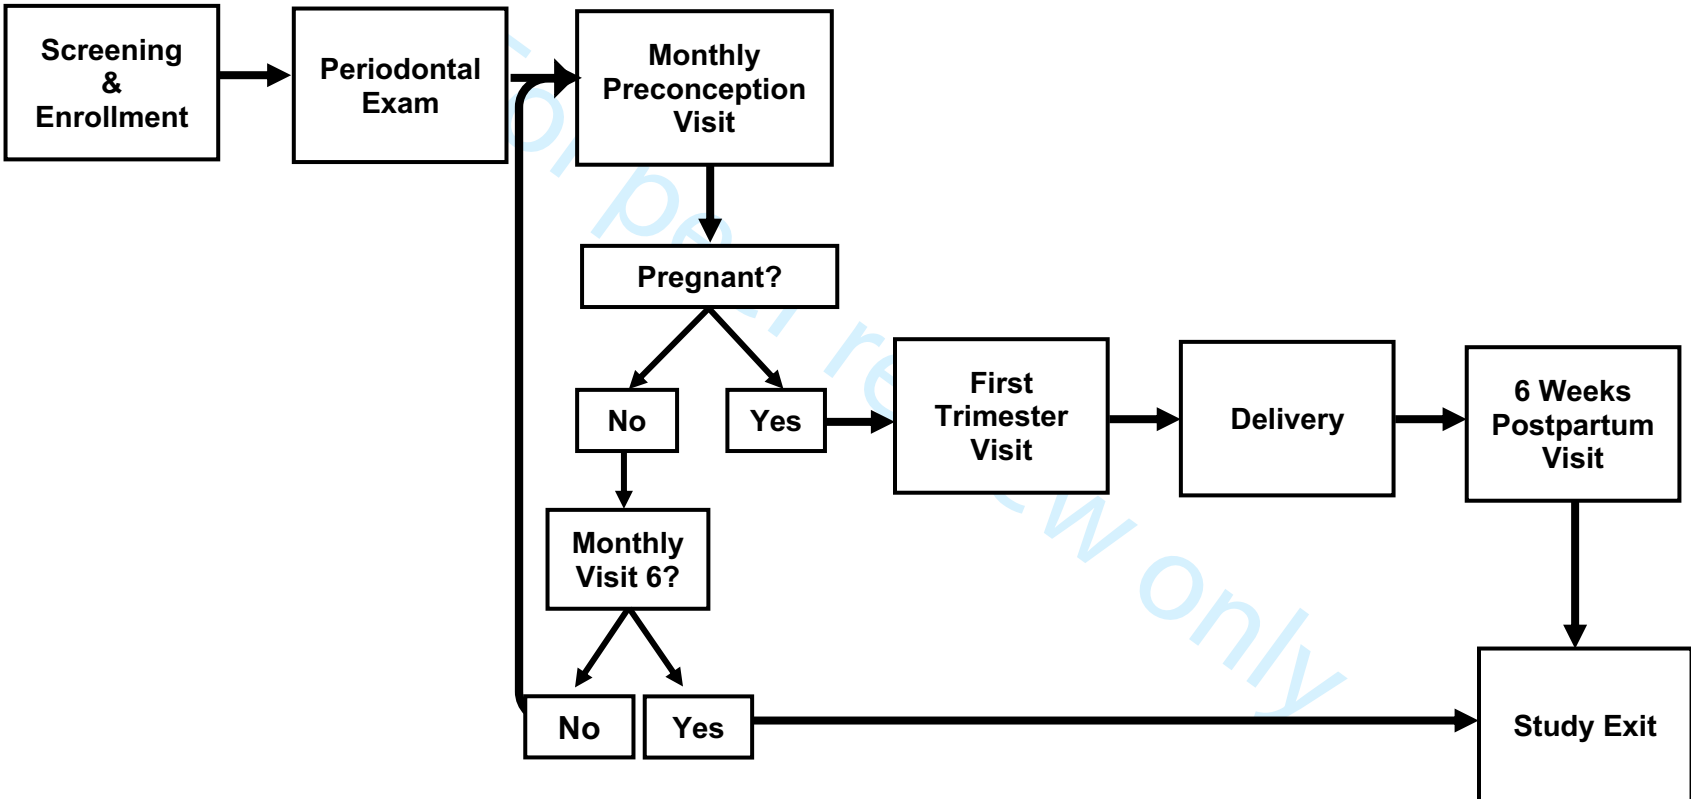

Supplement: bmjopen-2019-035186.draft_revisions.pdf [file bmjopen-2019-035186.draft_revisions.pdf]
